# Supplementary material
Source: ML conference proceedings conference paper supplement (https://openreview.net/forum?id=j8XnFfTvXF)
Supplement: supplementary_material [file _Neurips_2025__RLHF_MF.pdf › _Neurips_2025__RLHF_MF.pdf]

---

# Theoretical Analysis of KL-regularized RLHF with Multiple Reference Models

---

Anonymous Author(s)

Affiliation

Address

email

## Abstract

Recent methods for aligning large language models (LLMs) with human feedback predominantly rely on a single reference model, which limits diversity, model overfitting, and underutilizes the wide range of available pre-trained models. Incorporating multiple reference models has the potential to address these limitations by broadening perspectives, reducing bias, and leveraging the strengths of diverse open-source LLMs. However, integrating multiple reference models into reinforcement learning with human feedback (RLHF) frameworks poses significant theoretical challenges, where achieving exact solutions has remained an open problem. This paper presents the first *exact solution* to the multiple reference model problem in reverse KL-regularized RLHF. We introduce a comprehensive theoretical framework that includes rigorous statistical analysis and provides sample complexity guarantees. Additionally, we extend our analysis to forward KL-regularized RLHF, offering new insights into sample complexity requirements in multiple reference scenarios. Our contributions lay the foundation for more advanced and adaptable LLM alignment techniques, enabling the effective use of multiple reference models. This work paves the way for developing alignment frameworks that are both theoretically sound and better suited to the challenges of modern AI ecosystems.

## 1 Introduction

Large language models (LLMs) have revolutionized natural language processing (NLP) by demonstrating remarkable capabilities in understanding and generating human language. Powered by vast datasets and advanced neural architectures, these models have set new benchmarks across various NLP tasks, including machine translation and conversational agents. Despite these advancements, aligning LLMs with human values and preferences remains a critical challenge. Such misalignment can lead to undesirable behaviors, including the generation of biased or inappropriate content, which undermines the reliability and safety of these models [Gehman et al., 2020].

Reinforcement Learning from Human Feedback (RLHF) has emerged as a pivotal framework for addressing alignment challenges in LLMs. By fine-tuning LLMs based on human feedback, RLHF steers models towards more human-aligned behaviors, enhancing truthfulness, helpfulness, and harmlessness while maintaining their ability to generate accurate and high-probability outputs [Wirth et al., 2017, Christiano et al., 2017]. In RLHF, reward-based methods use a trained reward model to evaluate (prompt, response) pairs. These methods treat the language model as a policy that takes a prompt  $x$  and generates a response  $y$  conditioned on  $x$ , optimizing this policy to generate responses with maximum reward. Typically, a reference policy (usually the pretrained model before fine-tuning) is used as a baseline to regularize training, preventing excessive deviation from the original behavior.

An inherent limitation of most works on LLM alignment is their reliance on a *single reference model* [Wang et al., 2024b]. First, this restricts the diversity of linguistic patterns and inductive biases available during training. In that, it is over restrictive - potentially leading to a model that inherits the limitations or cultural biases of a single pretrained source. Second, such an approach is inefficient in utilizing the wealth of pre-trained models available in modern AI ecosystems, which excel in different domains and capture unique nuances, leaving valuable collective intelligence untapped. Therefore, incorporating multiple LLMs as reference models produces a model that reflects the characteristics of all reference models while satisfying human preferences. This approach is particularly relevant as the open-source community continues to release diverse pre-trained and fine-tuned LLMs of varying scales, trained on a wide range of datasets [Jiang et al., 2023, Penedo et al., 2023].

A solution is to extend the RLHF training to utilize *multiple reference models*. While RLHF with multiple reference models has demonstrated practical utility [Le et al., 2024], its theoretical underpinnings remain largely unexplored. A critical gap in current understanding is the lack of an exact solution for reverse KL-regularized RLHF when incorporating multiple reference models. This theoretical limitation has prevented the study of sample complexity of bounds on both optimality and sub-optimality gaps in the reverse KL-regularized framework. Addressing this problem is crucial for advancing the alignment of LLMs with human preferences in increasingly complex and diverse settings.

In this work, we provide the solutions for RLHF with multiple reference models when regularized via Reverse KL divergence (RKL) or forward KL divergence (FKL). In addition, we provide a statistical analysis of these scenarios. Our main contributions are as follows:

- We propose a comprehensive mathematical framework for reverse KL-regularized RLHF with multiple reference models and provide the exact solution for this problem and calculate the maximum objective value.
- We provide theoretical guarantees for the proposed multiple reference models scenario under reverse KL-regularization. In particular, we study the sample complexity<sup>1</sup> of reverse KL-regularized RLHF under multiple reference models.
- We also study the multiple reference models scenario under forward KL-regularized RLHF and analyze its sample complexity.

## 2 Related Works

**Multiple References:** Inspired by model soups [Wortsman et al., 2022], Chegini et al. [2024] propose a reference soup policy, achieved by averaging two independently trained supervised fine-tuned models, including the reference model. However, their approach lacks theoretical guarantees, particularly regarding its applicability to alignment tasks. More recently, Le et al. [2024] introduced the concept of multiple reference models for alignment. Due to the challenges in deriving a closed-form solution for the RLHF objective under multiple referencing constraints, the authors proposed a lower-bound approximation. In this work, we address this gap by deriving the closed-form solution for the multiple reference model scenario under reverse KL-regularization.

**Theoretical Foundation of RLHF:** Several works have studied the theoretical underpinnings of reverse KL-regularized RLHF, particularly in terms of sample complexity [Zhao et al., 2024, Xiong et al., 2024, Song et al., 2024, Zhan et al., 2023, Ye et al., 2024]. Among these, Zhao et al. [2024] analyze reverse KL-regularized RLHF, demonstrating the effect of reverse KL-regularization and establishing an upper bound on sub-optimality gap with  $O(1/n)$  sample complexity (convergence rate) where  $n$  represents the size of preference dataset. More detailed comparison with these works is provided in Section 7. However, to the best of our knowledge, the RLHF framework incorporating multiple reference models has not yet been studied.

**Forward KL-regularization and Alignment:** The forward KL-regularization for Direct Preference Optimization (DPO) proposed by Wang et al. [2024a]. The application of forward KL-regularization for alignment from demonstrations is shown in [Sun and van der Schaar, 2024]. The forward KL-regularization in stochastic decision problems is also studied by Cohen [2017]. To the best of our knowledge, the forward KL-regularized RLHF is not studied from a theoretical perspective.

---

<sup>1</sup>The sample complexity provides insight into how quickly bounds converge as the dataset size increases.

### 87 3 Preliminaries

88 **Notations:** Upper-case letters denote random variables (e.g.,  $Z$ ), lower-case letters denote the  
 89 realizations of random variables (e.g.,  $z$ ), and calligraphic letters denote sets (e.g.,  $\mathcal{Z}$ ). All logarithms  
 90 are in the natural base. The set of probability distributions (measures) over a space  $\mathcal{X}$  with finite  
 91 variance is denoted by  $\mathcal{P}(\mathcal{X})$ . The KL-divergence between two probability distributions on  $\mathbb{R}^d$  with  
 92 densities  $p(x)$  and  $q(x)$ , so that  $q(x) > 0$  when  $p(x) > 0$ , is  $\text{KL}(p\|q) := \int_{\mathbb{R}^d} p(x) \log(p(x)/q(x)) dx$   
 93 (with  $0/0 := 0$ ). The entropy of a distribution  $p(x)$  is denoted by  $H(p) = -\int_{\mathbb{R}^d} p(x) \log(p(x))$ .

94 We define the Escort and Generalized Escort distributions [Bercher, 2012] (a.k.a. normalized  
 95 geometric transformation).

96 **Definition 3.1** (Escort and Generalized Escort Distributions). *Given a discrete probability measure*  
 97  *$P$  defined on a set  $\mathcal{A}$ , and any  $\lambda \geq 0$ , we define the escort distribution  $(P)^\lambda$  for all  $a \in \mathcal{A}$  as*

$$(P)^\lambda(a) := \frac{(P(a))^\lambda}{\sum_{x \in \mathcal{A}} (P(x))^\lambda}.$$

98 *Given two discrete probability measures  $P$  and  $Q$  defined on a set  $\mathcal{A}$ , and any  $\lambda \in [0, 1]$ , we define*  
 99 *the generalized escort distribution  $(P, Q)^\lambda$  as the following tilted distribution:*

$$(P, Q)^\lambda(a) := \frac{P^\lambda(a) Q^{1-\lambda}(a)}{\sum_{x \in \mathcal{A}} P^\lambda(x) Q^{1-\lambda}(x)}.$$

100 Next, we introduce the functional derivative, see Cardaliaguet et al. [2019].

101 **Definition 3.2.** [Cardaliaguet et al., 2019] *A functional  $U : \mathcal{P}(\mathbb{R}^n) \rightarrow \mathbb{R}$  admits a functional*  
 102 *derivative if there is a map  $\frac{\delta U}{\delta m} : \mathcal{P}(\mathbb{R}^n) \times \mathbb{R}^n \rightarrow \mathbb{R}$  which is continuous on  $\mathcal{P}(\mathbb{R}^n)$  and, for all*  
 103  *$m, m' \in \mathcal{P}(\mathbb{R}^n)$ , it holds that*

$$U(m') - U(m) = \int_0^1 \int_{\mathbb{R}^n} \frac{\delta U}{\delta m}(m_\lambda, a) (m' - m)(da) d\lambda,$$

104 where  $m_\lambda = m + \lambda(m' - m)$ .

105 We also define the sensitivity of a policy  $\pi_r(y|x)$ , which is a function of reward function  $r(x, y)$ ,  
 106 with respect to the reward function as

$$\frac{\partial \pi}{\partial r}(r) := \lim_{\Delta r \rightarrow 0} \frac{\pi_r(y|x) - \pi_{r+\Delta r}(y|x)}{\Delta r}. \quad (1)$$

### 107 4 Problem Formulation

108 Following prior works [Ye et al., 2024, Zhao et al., 2024], we consider the problem of aligning a  
 109 policy  $\pi$  with human preferences. Given an input (prompt)  $x \in \mathcal{X}$  which is samples from  $\rho(x)$ , is  
 110 the finite space of input texts, the policy  $\pi \in \Pi$ , where  $\Pi$  is the set of policies, models a conditional  
 111 probability distribution  $\pi(y|x)$  over the finite space of output texts  $y \in \mathcal{Y}$ . From a given  $\pi$  and  $x$ , we  
 112 can sample an output (response)  $y \sim \pi(\cdot|x)$ .

113 **Preference Dataset:** Preference data is generated by sampling two outputs  $(y, y')|x$  from  $\pi_{\text{ref}}$  as the  
 114 reference policy (model), and presenting them to an agent, typically a human, for rating to indicate  
 115 which one is preferred. For example,  $y \succ y'$  denotes that  $y$  is preferred to  $y'$ . A preference dataset is  
 116 then denoted as  $D = \{y_i^w, y_i^l, x_i\}_{i=1}^n$ , where  $n$  is the number of data points,  $y_w$  and  $y_l$  denote the  
 117 preferred (chosen) and dispreferred (rejected) outputs, respectively.

118 We assume that there exists a true model of the agent’s preference  $p^*(y \succ y'|x)$ , which assigns the  
 119 probability of  $y$  being preferred to  $y'$  given  $x$  based on the latent reward model which is unknown.

#### 120 4.1 RLHF from One Reference Model

121 Using the dataset  $\mathcal{D}$ , our goal is to find a policy  $\pi$  that maximizes the expected preference while being  
 122 close to a reference policy  $\pi_{\text{ref}}$ . In this approach, Bradley-Terry model Bradley and Terry [1952] is  
 123 employed as the preference model,  $p(y \succ y'|x) = \sigma(r_\theta(x, y) - r_\theta(x, y'))$ ,

where  $\sigma$  denotes the sigmoid function and  $r_\theta : \mathcal{X} \times \mathcal{Y} \rightarrow \mathbb{R}$  is a reward model parameterized by  $\theta$ , which assigns a scalar score to indicate the suitability of output  $y$  for input  $x$ . In [Christiano et al. \[2017\]](#), the reward model is trained on  $D$  to maximize the log-likelihood (MLE) estimator:

$$\mathcal{L}_R(\theta, D) = \sum_{i=1}^n \frac{1}{n} \log \sigma(r_\theta(x_i, y_w^i) - r_\theta(x_i, y_l^i)). \quad (2)$$

Given a trained reward model  $r_{\hat{\theta}}(x, y)$  where  $\hat{\theta} = \arg \max_{\theta \in \Theta} \mathcal{L}_R(\theta, D)$ , we can consider the regularized optimization objective which is regularized via reverse KL-regularized or forward KL-regularized.

**Reverse KL-regularized RLHF:** A crucial component of RLHF is the use of a reference model to compute a Reverse Kullback-Leibler (KL) divergence penalty. This penalty ensures that the process does not deviate excessively from the original model, mitigating the risk of generating nonsensical responses [\[Ziegler et al., 2019\]](#). The reverse KL-regularized optimization objective for  $(\gamma > 0)$  can be represented as:

$$\max_{\pi} \mathbb{E}_{Y \sim \pi(\cdot|x)} [r_{\hat{\theta}}(x, Y)] - \frac{1}{\gamma} \text{KL}(\pi(\cdot|x) \parallel \pi_{\text{ref}}(\cdot|x)), \quad (3)$$

Note that the solution of (3) is,

$$\pi_{\hat{\theta}}^\gamma(y|x) := \frac{\pi_{\text{ref}}(y|x) \exp(\gamma r_{\hat{\theta}}(x, y))}{Z(x)}, \quad (4)$$

where  $Z(x) = \mathbb{E}_{Y \sim \pi_{\text{ref}}(\cdot|x)} [\exp(\gamma r_{\hat{\theta}}(x, Y))]$  is the normalization factor. Similarly, we can define  $\pi_{\theta^*}^\gamma(y|x)$  using  $r_{\theta^*}(x, y)$  instead of  $r_{\hat{\theta}}(x, y)$  in (4). This RLHF objective is employed to train LLMs such as Instruct-GPT [Ouyang et al. \[2022\]](#) using PPO [Schulman et al. \[2017\]](#).

We define  $J(\pi_{\theta^*}(\cdot|x)) = \mathbb{E}_{Y \sim \pi_{\theta^*}(\cdot|x)} [r_{\theta^*}(x, Y)]$  (a.k.a. value function<sup>2</sup>) and provide an upper bound on optimal gap,

$$\mathcal{J}(\pi_{\theta^*}^\gamma(\cdot|x), \pi_{\hat{\theta}}^\gamma(\cdot|x)) := J(\pi_{\theta^*}^\gamma(\cdot|x)) - J(\pi_{\hat{\theta}}^\gamma(\cdot|x)). \quad (5)$$

Furthermore, inspired by [\[Song et al., 2024, Zhao et al., 2024\]](#), we consider the following RLHF objective function based on the true reward function,

$$J_\gamma(\pi_{\text{ref}}(\cdot|x), \pi_\theta(\cdot|x)) := \mathbb{E}_{Y \sim \pi_\theta(\cdot|x)} [r_{\theta^*}(Y, x)] - \frac{1}{\gamma} \text{KL}(\pi_\theta(\cdot|x) \parallel \pi_{\text{ref}}(\cdot|x)). \quad (6)$$

As studied by [Zhao et al. \[2024\]](#), [Song et al. \[2024\]](#), [Zhan et al. \[2023\]](#), we also aim to study the following sub-optimality gap,

$$\mathcal{J}^\gamma(\pi_{\theta^*}^\gamma(\cdot|x), \pi_{\hat{\theta}}^\gamma(\cdot|x)) := J_\gamma(\pi_{\text{ref}}(\cdot|x), \pi_{\theta^*}^\gamma(\cdot|x)) - J_\gamma(\pi_{\text{ref}}(\cdot|x), \pi_{\hat{\theta}}^\gamma(\cdot|x)). \quad (7)$$

**Forward KL-regularized RLHF:** Inspired by [\[Wang et al., 2024a\]](#), we can consider the forward KL-regularized optimization objective as,

$$\max_{\pi} \mathbb{E}_{Y \sim \pi(\cdot|x)} [r_{\hat{\theta}}(x, Y)] - \frac{1}{\gamma} \text{KL}(\pi_{\text{ref}}(\cdot|x) \parallel \pi(\cdot|x)), \quad (8)$$

As discussed in [\[Wang et al., 2024a\]](#), this optimization problem has an implicit solution given by:

$$\tilde{\pi}_{\hat{\theta}}^\gamma(y|x) := \frac{\pi_{\text{ref}}(y|x)}{\gamma(\tilde{Z}_{\hat{\theta}}(x) - r_{\hat{\theta}}(x, y))} \quad (9)$$

where  $\tilde{Z}_{\hat{\theta}}(x)$  is normalization constant ensuring that  $\int_{\mathcal{Y}} \tilde{\pi}_{\hat{\theta}}^\gamma(y|x) dy = 1$ . Some properties of  $\tilde{Z}_{\hat{\theta}}(x)$  are discussed in App. E.

Similar to (5) and (7), for forward KL-regularized RLHF, we can define,

$$\tilde{J}_\gamma(\pi_{\text{ref}}(\cdot|x), \pi_\theta(\cdot|x)) := \mathbb{E}_{Y \sim \pi_\theta(\cdot|x)} [r_{\theta^*}(Y, x)] - \frac{1}{\gamma} \text{KL}(\pi_{\text{ref}}(\cdot|x) \parallel \pi_\theta(\cdot|x)), \quad (10)$$

$$\tilde{\mathcal{J}}^\gamma(\tilde{\pi}_{\theta^*}^\gamma(\cdot|x), \tilde{\pi}_{\hat{\theta}}^\gamma(\cdot|x)) := \tilde{J}_\gamma(\pi_{\text{ref}}(\cdot|x), \tilde{\pi}_{\theta^*}^\gamma(\cdot|x)) - \tilde{J}_\gamma(\pi_{\text{ref}}(\cdot|x), \tilde{\pi}_{\hat{\theta}}^\gamma(\cdot|x)). \quad (11)$$

<sup>2</sup>We can also consider  $\mathbb{E}_{X \sim \rho(\cdot)} [J(\pi(\cdot|X))]$ . All of our results also holds for expected version of value function.

## 4.2 Assumptions

For our analysis, the following assumptions are needed.

**Assumption 4.1** (Bounded Reward). *We assume that the true and parametrized reward functions,  $r_{\theta^*}(x, y)$  and  $r_{\hat{\theta}}(x, y)$ , are non-negative functions and bounded by  $R_{\max}$ .*

**Assumption 4.2** (Finite Class). *We assume that the reward function class,  $\mathcal{R}$ , is finite,  $|\mathcal{R}| < \infty$ .*

The assumption of bounded rewards (Assumption 4.1) and Finite class (Assumption 4.2) are common in the literature [Song et al., 2024, Zhan et al., 2023, Zhao et al., 2024, Chang et al., 2024, Xiong et al., 2024]. More discussion regarding these assumptions are provided in App. C.

Coverage conditions play a fundamental role in understanding the theoretical guarantees of RLHF algorithms. We first introduce the most stringent coverage requirement, known as global coverage [Munos and Szepesvári, 2008]:

**Assumption 4.3** (Global Coverage). *For all policies  $\pi$ , we require  $\max_{x, y: \rho(x) > 0} \frac{\pi(y|x)}{\hat{\pi}_{\text{ref}}(y|x)} \leq C_{\text{GC}}$ , where  $\hat{\pi}_{\text{ref}}$  denotes the reference model and  $C_{\text{GC}} \in \mathbb{R}^+$  is a finite constant.*

A key implication of Assumption 4.3 is that it requires substantial coverage: specifically, for any prompt  $x$  and token sequence  $y$  in the support of  $\rho$ , we must have  $\hat{\pi}_{\text{ref}}(y|x) \geq \frac{1}{C_{\text{GC}}}$ .

While global coverage has been extensively studied in the offline RL literature [Uehara and Sun, 2021, Zhan et al., 2022], it imposes strong requirements that may be unnecessarily restrictive for RLHF. A key insight from recent work [Zhao et al., 2024, Song et al., 2024] is that RLHF algorithms inherently employ reverse KL-regularization, which ensures learned policies remain within a neighborhood of the reference model. This observation motivates a more refined coverage condition:

**Assumption 4.4** (Local Reverse KL-ball Coverage). *Consider  $\varepsilon_{\text{rkl}} < \infty$  and any policy  $\pi$  satisfying  $\mathbb{E}_{x \sim \rho}[\text{KL}(\pi(\cdot|x) \parallel \hat{\pi}_{\text{ref}}(\cdot|x))] \leq \varepsilon_{\text{rkl}}$ , we require  $\max_{x, y: \rho(x) > 0} \frac{\pi(y|x)}{\hat{\pi}_{\text{ref}}(y|x)} \leq C_{\varepsilon_{\text{rkl}}}$ , where  $C_{\varepsilon_{\text{rkl}}} \in \mathbb{R}^+$  depends on the KL threshold  $\varepsilon_{\text{rkl}}$ .*

Similar to Assumption 4.4, we consider the forward KL-ball coverage assumption.

**Assumption 4.5** (Local Forward KL-ball Coverage). *Consider  $\varepsilon_{\text{fkl}} < \infty$  and any policy  $\pi$  satisfying  $\mathbb{E}_{x \sim \rho}[\text{KL}(\hat{\pi}_{\text{ref}}(\cdot|x) \parallel \pi(\cdot|x))] \leq \varepsilon_{\text{fkl}}$ , we require  $\max_{x, y: \rho(x) > 0} \frac{\pi(y|x)}{\hat{\pi}_{\text{ref}}(y|x)} \leq C_{\varepsilon_{\text{fkl}}}$ , where  $C_{\varepsilon_{\text{fkl}}} \in \mathbb{R}^+$  depends on the KL threshold  $\varepsilon_{\text{fkl}}$ .*

The local reverse or forward KL-ball coverage condition offers several advantages. Focusing only on policies within a reverse KL-ball of the reference model provides sharper theoretical guarantees while imposing weaker requirements. This localization aligns naturally with RLHF algorithms, which explicitly constrain the learned policy’s divergence from the reference model. For any fixed reference model  $\pi_{\text{ref}}$ , the reverse or forward KL local coverage constant is always bounded by the global coverage constant:  $\max(C_{\varepsilon_{\text{rkl}}}, C_{\varepsilon_{\text{fkl}}}) \leq C_{\text{GC}}$ . This follows from the fact that KL-constrained policies form a subset of all possible policies.

## 5 RLHF from Multiple Reference Models via Reverse KL divergence

In this section, inspired by Le et al. [2024], we are focused on situations involving  $K$  reference policies  $\left\{ \pi_{\text{ref}, i} \right\}_{i=1}^K$  where the latent reward model among all reference policies is the same. All proof details are deferred to Appendix D.

### 5.1 Exact Solution of RLHF under multiple reference models via RKL

Inspired by [Le et al., 2024], our objective can be formulated as a multiple reference models RLHF objective,

$$\max_{\pi} \mathbb{E}_{Y \sim \pi(\cdot|x)} [r(x, Y)] - \frac{1}{\gamma} \left( \sum_{i=1}^K \alpha_i \text{KL}(\pi(\cdot|x) \parallel \pi_{\text{ref}, i}(\cdot|x)) \right), \quad (12)$$

where  $\alpha_i$  are weighting coefficients for each reference policy and  $\sum_{i=1}^K \alpha_i = 1$ . This objective was explored in previous studies, leading to enhancements in pure RL problems Le et al. [2022].

194 However, addressing this optimization problem in LLMs through reward learning and RL finetuning  
 195 pose similar challenges to (3). Our goal is to derive a closed-form solution for the multi-reference  
 196 RLHF objective in (12). Note that in [Le et al., 2024, Proposition 1], a lower bound on RLHF  
 197 objective in (12) is proposed, and the solution for this surrogate objective function is derived as  
 198 follows,

$$\pi_L(y|x) = \frac{\tilde{\pi}_{\text{ref}}(y|x)}{\hat{Z}_1(x)} \exp(\gamma r(x, y)), \quad (13)$$

199 where  $\tilde{\pi}_{\text{ref}}(y|x) = \left( \sum_{i=1}^K \frac{\alpha_i}{\pi_{\text{ref},i}(y|x)} \right)^{-1}$  and  $\hat{Z}_1(x) = \sum_y \tilde{\pi}_{\text{ref}}(y|x) \exp(\gamma r(x, y))$ .

200 In contrast, in the following theorem, we provide the *exact* solution of the objective function for the  
 201 multiple reference model (12).

202 **Theorem 5.1.** *Consider the following objective function for RLHF with multiple reference models,*

$$\max_{\pi} \left\{ \mathbb{E}_{Y \sim \pi(\cdot|x)} [r_{\theta^*}(x, Y)] - \frac{1}{\gamma} \left( \sum_{i=1}^K \alpha_i \text{KL}(\pi(\cdot|x) \parallel \pi_{\text{ref},i}(\cdot|x)) \right) \right\},$$

203 where  $\sum_{i=1}^K \alpha_i = 1$  and  $\alpha_i \in (0, 1)$  for  $i \in [K]$ . Then, the exact solution of the multiple reference  
 204 model objective function for RLHF is,

$$\pi_{\theta^*}^{\gamma}(y|x) = \frac{\hat{\pi}_{\alpha, \text{ref}}(y|x)}{\hat{Z}(x)} \exp(\gamma r_{\theta^*}(x, y)), \quad (14)$$

205 where

$$\hat{\pi}_{\alpha, \text{ref}}(y|x) = \frac{\prod_{i=1}^K \pi_{\text{ref},i}^{\alpha_i}(y|x)}{F_{\alpha}(x)}, \quad F_{\alpha}(x) = \sum_{y \in \mathcal{Y}} \prod_{i=1}^K \pi_{\text{ref},i}^{\alpha_i}(y|x), \quad (15)$$

206 and  $\hat{Z}(x) = \sum_y \hat{\pi}_{\alpha, \text{ref}}(y|x) \exp(\gamma r_{\theta^*}(x, y))$ . The maximum objective value is  
 207  $\frac{1}{\gamma} \log \left( \sum_y \prod_{i=1}^K \pi_{\text{ref},i}^{\alpha_i}(y|x) \exp(\gamma r(x, y)) \right)$ .

208 Note that this result does not rely on the assumptions stated in Subsection 4.2 and in fact holds in  
 209 greater generality. Using Theorem 5.1, we can consider the following optimization problem for the  
 210 multiple reference models scenario.

$$\mathbb{E}_{Y \sim \pi(\cdot|x)} [r_{\theta^*}(x, Y)] - \frac{1}{\gamma} \text{KL}(\pi(\cdot|x) \parallel \hat{\pi}_{\alpha, \text{ref}}(\cdot|x)), \quad (16)$$

211 where  $\hat{\pi}_{\alpha, \text{ref}}(y|x)$  is defined in (15) as generalized escort reference policy. The algorithm of reverse  
 212 KL-regularized RLHF with two reference models is presented in App. A.

## 213 5.2 Main Results for RLHF via RKL

214 In this section, we provide our main theoretical results for the RLHF algorithm with multiple reference  
 215 models based on reverse KL-regularization. Using the convexity of reverse KL divergence, we can  
 216 provide an upper bound on the sub-optimality gap. Furthermore, we assume that Assumption 4.4  
 217 holds under  $\hat{\pi}_{\alpha, \text{ref}}(\cdot|x)$  as reference policy with  $C_{\alpha, \varepsilon_{\text{rkl}}}$ . First, we can derive the following upper  
 218 bound on the sub-optimality gap of the RLHF algorithm with multiple reference models.

219 **Theorem 5.2.** *Under Assumption 4.1, 4.2 and 4.4, the following upper bound holds on the sub-*  
 220 *optimality gap with probability at least  $(1 - \delta)$  for  $\delta \in (0, 1/2)$ ,*

$$\mathcal{J}^{\gamma}(\pi_{\theta^*}^{\gamma}(\cdot|x), \pi_{\theta}^{\gamma}(\cdot|x)) \leq \gamma C_{\alpha, \varepsilon_{\text{rkl}}} 128 e^{4R_{\max}} R_{\max}^2 \frac{\log(|\mathcal{R}|/\delta)}{n}. \quad (17)$$

221 Using Theorem 5.2, we can provide the upper bound on the optimal gap under the RLHF algorithm.

222 **Theorem 5.3.** *Under Assumption 4.1, 4.2 and 4.4, there exists constant  $C > 0$  such that the following*  
 223 *upper bound holds on optimality gap of reverse KL-regularized RLHF with probability at least  $(1 - \delta)$*   
 224 *for  $\delta \in (0, 1/2)$ ,*

$$\mathcal{J}(\pi_{\theta^*}^{\gamma}(\cdot|x), \pi_{\theta}^{\gamma}(\cdot|x)) \leq \gamma C_{\alpha, \varepsilon_{\text{rkl}}} 128 e^{4R_{\max}} R_{\max}^2 \frac{\log(|\mathcal{R}|/\delta)}{n} + C 8 R_{\max} e^{2R_{\max}} \sqrt{\frac{2 C_{\alpha, \varepsilon_{\text{rkl}}} \log(|\mathcal{R}|/\delta)}{n}}.$$



**Remark 5.4** (Sample Complexity). We can observe sample complexity of  $O(1/n)$  for the sub-optimality gap and  $O(1/\sqrt{n})$  for the optimality gap from Theorem 5.2 and Theorem 5.3, respectively.

## 6 RLHF from Multiple Reference Models via Forward KL Divergence

In this section, inspired by [Wang et al., 2024a], we extend the RLHF from multiple reference models based on reverse KL-regularization Le et al. [2024] to forward KL-regularization. Similar, to Section 5, we are focused on situations involving  $K$  reference policies  $\{\pi_{\text{ref},i}\}_{i=1}^K$  where the latent reward model among all reference policies is the same. All proof details are deferred to Appendix E.

### 6.1 Solution of RLHF under multiple reference models via FKL

Inspired by [Le et al., 2024, Wang et al., 2024a], our objective can be formulated as a multiple reference models RLHF objective,

$$\max_{\pi} \mathbb{E}_{Y \sim \pi(\cdot|x)} [r(x, Y)] - \frac{1}{\gamma} \left( \sum_{i=1}^K \beta_i \text{KL}(\pi_{\text{ref},i}(\cdot|x) \parallel \pi(\cdot|x)) \right), \quad (18)$$

where  $\beta_i$  are weighting coefficients for each reference policy and  $\sum_{i=1}^K \beta_i = 1$ . This objective was explored in previous studies, leading to enhancements in pure RL problems Le et al. [2022]. However, addressing this optimization problem in LLMs through reward learning and RL finetuning poses similar challenges to (3). Our goal is to derive a closed-form solution for the multi-reference RLHF objective in (18).

We now provide the exact solution of the RLHF with multiple references.

**Theorem 6.1.** Consider the following objective function for RLHF with multiple reference models,

$$\max_{\pi} \mathbb{E}_{Y \sim \pi(\cdot|x)} [r_{\theta^*}(x, Y)] - \frac{1}{\gamma} \left( \sum_{i=1}^K \beta_i \text{KL}(\pi_{\text{ref},i}(\cdot|x) \parallel \pi(\cdot|x)) \right),$$

where  $\sum_{i=1}^K \beta_i = 1$  and  $\beta_i \in (0, 1)$  for  $i \in [K]$ . Then, the implicit solution of the multiple reference models objective function for RLHF is,

$$\tilde{\pi}_{\theta^*}^{\gamma}(y|x) = \frac{\bar{\pi}_{\beta, \text{ref}}(y|x)}{\gamma(\tilde{Z}(x) - r_{\theta^*}(x, y))}, \quad (19)$$

where  $\bar{\pi}_{\beta, \text{ref}}(y|x) = \sum_{i=1}^K \beta_i \pi_{\text{ref},i}(y|x)$ , and  $\tilde{Z}(x)$  is the solution to  $\int_{y \in \mathcal{Y}} \tilde{\pi}_{\theta^*}^{\gamma}(y|x) = 1$  for a given  $x \in \mathcal{X}$ .

Using Theorem 6.1, we can consider the following optimization problem for forward KL-regularized RLHF under multiple reference model scenario,

$$\mathbb{E}_{Y \sim \pi(\cdot|x)} [r_{\theta^*}(x, y)] - \frac{1}{\gamma} \text{KL}(\bar{\pi}_{\beta, \text{ref}}(\cdot|x) \parallel \pi(\cdot|x)), \quad (20)$$

where  $\bar{\pi}_{\beta, \text{ref}}(y|x)$  is defined in Theorem 6.1 as weighted reference policy. The algorithm of forward KL-regularized RLHF with two reference models is presented in App. A.

### 6.2 Main Results for RLHF with FKL

This section presents our core theoretical analysis of forward KL-regularized RLHF under the multiple reference model setting. We begin by leveraging KL divergence’s convex properties to establish an upper bound on the sub-optimality gap. Throughout this section, we consider  $\tilde{\pi}_{\theta}^{\gamma}(y|x) = \frac{\bar{\pi}_{\beta, \text{ref}}(y|x)}{\gamma(\tilde{Z}_{\theta}(x) - r_{\theta}(x, y))}$  and  $\tilde{\pi}_{\theta^*}^{\gamma}(y|x) = \frac{\bar{\pi}_{\beta, \text{ref}}(y|x)}{\gamma(\tilde{Z}_{\theta^*}(x) - r_{\theta^*}(x, y))}$ . Furthermore, we assume that Assumption 4.5 holds under  $\bar{\pi}_{\beta, \text{ref}}(y|x)$  as reference policy with  $C_{\beta, \epsilon_{\text{rkl}}}$ . First, we derive an upper bound for the sub-optimality gap in the multiple reference forward KL-regularized RLHF setting.

Table 1: Comparison of Various Works in Theoretical Foundation of RLHF: Key features include support for RKL sub-optimality gap, RKL optimality gap, FKL sub-optimality gap, and FKL optimality gap and their Sample Complexities for each scenario.

| Work                | RKL Sub-optimality Gap<br>(Sample Complexity) | RKL Optimality Gap<br>(Sample Complexity) | FKL Sub-optimality Gap<br>(Sample Complexity) | FKL Optimality Gap<br>(Sample Complexity) |
|---------------------|-----------------------------------------------|-------------------------------------------|-----------------------------------------------|-------------------------------------------|
| Song et al. [2024]  | $O(1/\sqrt{n})$                               | $\times$                                  | $\times$                                      | $\times$                                  |
| Zhao et al. [2024]  | $O(1/n)$                                      | $\times$                                  | $\times$                                      | $\times$                                  |
| Chang et al. [2024] | $\times$                                      | $O(1/\sqrt{n})$                           | $\times$                                      | $\times$                                  |
| Xiong et al. [2024] | $O(1/\sqrt{n})$                               | $\times$                                  | $\times$                                      | $\times$                                  |
| <b>Our Work</b>     | $O(1/n)$                                      | $O(1/\sqrt{n})$                           | $O(1/\sqrt{n})$                               | $O(1/\sqrt{n})$                           |

**Theorem 6.2.** Under Assumption 4.1, 4.2 and 4.4, the following upper bound holds on the sub-optimality gap with probability at least  $(1 - \delta)$  for  $\delta \in (0, 1)$ ,

$$\tilde{\mathcal{J}}^\gamma(\tilde{\pi}_{\theta^*}^\gamma(\cdot|x), \tilde{\pi}_{\hat{\theta}}^\gamma(\cdot|x)) \leq 16C_{\beta, \varepsilon_{\text{fkl}}} e^{2R_{\max}} R_{\max} \sqrt{\frac{\log(|\mathcal{R}|/\delta)}{n}}. \quad (21)$$

Using Theorem 6.2, we can provide the upper bound on the optimal gap under the multiple reference forward KL-regularized RLHF setting.

**Theorem 6.3.** Under Assumption 4.1, 4.2 and 4.4, the following upper bound holds on optimality gap of the multiple reference forward KL-regularized RLHF algorithm with probability at least  $(1 - \delta)$  for  $\delta \in (0, 1)$ ,

$$\tilde{\mathcal{J}}(\tilde{\pi}_{\theta^*}^\gamma(\cdot|x), \tilde{\pi}_{\hat{\theta}}^\gamma(\cdot|x)) \leq 16C_{\beta, \varepsilon_{\text{fkl}}} e^{2R_{\max}} R_{\max} \sqrt{\frac{\log(|\mathcal{R}|/\delta)}{n}} + \frac{\max(|\log(C_{\beta, \varepsilon_{\text{fkl}}})|, \log(\gamma R_{\max} + 1))}{\gamma}.$$

**Remark 6.4** (Sample Complexity). Choosing  $\gamma = n$ , we have sample complexity  $O(1/\sqrt{n})$  on optimality gap from Theorem 6.3. We can also observe the sample complexity of  $O(1/\sqrt{n})$  for the sub-optimality gap.

## 7 Discussion

**Theoretical Comparison with Single-Reference Models:** Our theoretical results extend to the single-reference model setting, enabling comparison with existing work in this domain. The RKL-regularized RLHF framework and its sub-optimality gap have been investigated by Song et al. [2024] and Zhao et al. [2024], who established sample complexity bounds. Song et al. [2024] derived a sub-optimality gap sample complexity of  $O(1/\sqrt{n})$ , which Zhao et al. [2024] later improved to  $O(1/n)$ , demonstrating the effectiveness of RKL regularization. Note that, in [Zhao et al., 2024], it is shown that when the error tolerance  $\epsilon$  is sufficiently small, the sample complexity follows an  $O(1/\epsilon)$  relationship. This corresponds to  $O(1/n)$ , where  $n$  represents the dataset size. In comparison with [Zhao et al., 2024], we proposed an approach based on functional derivative and convexity of KL divergence. Our approach is more general and can be applied to the forward KL-regularized RLHF framework. There are also some works on similar algorithms to RLHF. Additionally, Chang et al. [2024] proposed an algorithm integrating offline and online preference datasets in RLHF, analyzing its optimality gap sample complexity under RKL regularization. The general reverse KL-regularized RLHF framework under general preference models is studied by Xiong et al. [2024] and a sample complexity of  $O(1/\sqrt{n})$  for sub-optimality gap is derived. To the best of our knowledge, the sample complexity of the optimality gap and sub-optimality gap for forward KL-regularization have not been studied in the literature. Furthermore, in [Huang et al., 2024], KL-divergence and  $\chi^2$ -divergence are considered as regularizers, and the sample complexity on optimality gap for  $\chi^2$ -DPO are studied. We summarized our comparison with different works related to the theoretical study of RLHF in Table 1. Furthermore, we discuss the extension of multiple reference models scenario to DPO, where we propose the DPO objective function for reverse and forward KL-regularization under multiple reference models and derive optimality gap under bounded implicit reward assumptions App. F. Further discussion, e.g., coverage assumption and comparison of RKL with FKL, are provided in App. G.



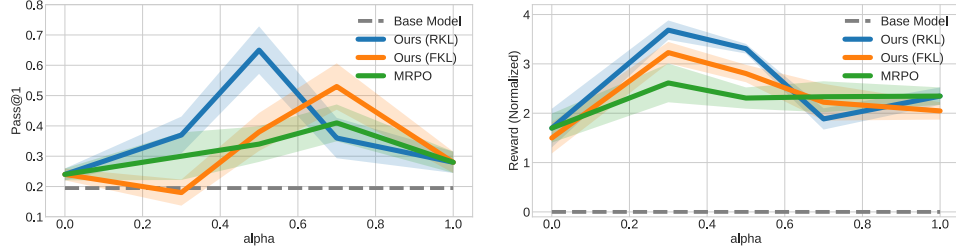

(a) Mean and 95% CI for pass@1 performance on GSM8K using policy gradient algorithms.

(b) Mean normalized reward and 95% CI on the UltraFeedback dataset, using offline RLHF.

Figure 1: In both online and offline RL, our analytical RKL objective outperforms both the MRPO approximation and single reference objective ( $\alpha = 0$ ).

## 8 Experiments

To support our theoretical findings, we conducted two sets of experiments: one using an online policy gradient algorithm, and another using an offline RLHF algorithm. Together, these experiments are designed to cover the primary use cases of KL-constrained RL optimization in the LLM post-training setting. Our experiments address two goals:

1. Evaluating the benefits of using multiple reference models versus a single reference.
2. Comparing our exact analytical solution to the approximation proposed by [Le et al. \[2024\]](#).

**Online RL.** Since our theory applies to general KL-constrained RL - not only to settings with learned reward models, as in standard RLHF - we ran an experiment on the GSM8K dataset [\[Cobbe et al., 2021\]](#) using GRPO [\[Shao et al., 2024\]](#), a policy gradient method. This setup uses a solution verifier as the reward model, avoiding complications from learned rewards and letting us focus on the effect of multiple reference models during training. We trained the instruction-tuned 0.5B model from the Qwen 2.5 family [\[Yang et al., 2024\]](#), and used the 1.5B math-specialized model from the same family as a second reference. For each value of  $\alpha \in \{0.0, 0.3, 0.5, 0.7, 1.0\}$ , for FKL we consider  $\beta = \alpha$ , we trained models using the following regularization: (1) *Normalized geometric mean* as in our multi-reference RKL objective, (2) *Arithmetic mean* as an approximation of our multi-reference FKL objective, and (3) *MRPO approximation* [\[Le et al., 2024\]](#) of the multi-reference RKL objective.

**Offline RL.** This experiment compares our exact analytical solution to MRPO [\[Le et al., 2024\]](#) in an offline RLHF setting. We trained the instruction-tuned 0.5B Qwen 2.5 model using the UltraFeedback dataset [\[Cui et al., 2023\]](#), with the 1.5B Qwen 2.5 model as the second reference. This can be seen as a combination of knowledge distillation [\[Gu et al., 2023\]](#) and RLHF. Evaluation was performed using the Skywork-Reward-Llama-3.1-8B-v0.2 reward model [\[Liu et al., 2024\]](#). Here again we compared three training algorithms: (1) *DPO* [\[Rafailov et al., 2023\]](#) using the normalized geometric mean of reference policies, (2) *DPO based on FKL divergence* as proposed by [\[Wang et al., 2024a\]](#) using the arithmetic mean, and (3) *MRPO* version of DPO [\[Le et al., 2024\]](#).

For more details on the experimental setting and discussion on the computational aspects of using multi-reference, see Appendix H.

## 9 Conclusion and Future Works

This work develops theoretical foundations for two Reinforcement Learning from Human Feedback (RLHF) frameworks: reverse KL-regularized and forward KL-regularized RLHF. We derive solutions for both frameworks under multiple reference scenarios and establish their sample complexity bounds. Our analysis reveals that while both algorithms share identical sample complexity for the optimality gap, the reverse KL-regularized RLHF achieves superior sample complexity for the sub-optimality gap.

The main limitation of our work lies in the assumption of bounded reward functions where some solutions are proposed to solve this limitation in App C. Two promising directions for future research emerge: (a) Extending our analysis to multiple-reference KL-regularized RLHF with unbounded reward or sub-Gaussian functions, (b) following [\[Wang et al., 2024a\]](#), investigating multiple-reference RLHF regularized by general  $f$ -divergences, (c) following [\[Sharifnassab et al., 2024\]](#), we can extend our analysis to general preference models beyond Bradley-Terry (BT) model.

## References

- Ananth Balashankar, Ziteng Sun, Jonathan Berant, Jacob Eisenstein, Michael Collins, Adrian Hutter, Jong Lee, Chirag Nagpal, Flavien Prost, Aradhana Sinha, Ananda Theertha Suresh, and Ahmad Beirami. InfAlign: Inference-aware language model alignment. *International Conference on Machine Learning (ICML)*, 2025.
- J-F Bercher. A simple probabilistic construction yielding generalized entropies and divergences, escort distributions and q-gaussians. *Physica A: Statistical Mechanics and its Applications*, 391(19):4460–4469, 2012.
- Stéphane Boucheron, Gábor Lugosi, and Pascal Massart. *Concentration inequalities: A nonasymptotic theory of independence*. Oxford University Press, 2013.
- Ralph Allan Bradley and Milton E Terry. Rank analysis of incomplete block designs: I. the method of paired comparisons. *Biometrika*, 39(3/4):324–345, 1952.
- Pierre Cardaliaguet, François Delarue, Jean-Michel Lasry, and Pierre-Louis Lions. *The master equation and the convergence problem in mean field games:(ams-201)*. Princeton University Press, 2019.
- Jonathan D Chang, Wenhao Zhan, Owen Oertell, Kianté Brantley, Dipendra Misra, Jason D Lee, and Wen Sun. Dataset reset policy optimization for rlhf. *arXiv preprint arXiv:2404.08495*, 2024.
- Atoosa Chegini, Hamid Kazemi, Iman Mirzadeh, Dong Yin, Maxwell Horton, Moin Nabi, Mehrdad Farajtabar, and Keivan Alizadeh. Salsa: Soup-based alignment learning for stronger adaptation in rlhf. *arXiv preprint arXiv:2411.01798*, 2024.
- Paul F Christiano, Jan Leike, Tom Brown, Miljan Martic, Shane Legg, and Dario Amodei. Deep reinforcement learning from human preferences. *Advances in neural information processing systems*, 30, 2017.
- Karl Cobbe, Vineet Kosaraju, Mohammad Bavarian, Mark Chen, Heewoo Jun, Lukasz Kaiser, Matthias Plappert, Jerry Tworek, Jacob Hilton, Reiichiro Nakano, et al. Training verifiers to solve math word problems. *arXiv preprint arXiv:2110.14168*, 2021.
- Samuel N Cohen. Data-driven nonlinear expectations for statistical uncertainty in decisions. *Electronic Journal of Statistics*, 11:1858–1889, 2017.
- Ganqu Cui, Lifan Yuan, Ning Ding, Guanming Yao, Wei Zhu, Yuan Ni, Guotong Xie, Zhiyuan Liu, and Maosong Sun. Ultrafeedback: Boosting language models with high-quality feedback. 2023.
- David A Freedman. On tail probabilities for martingales. *the Annals of Probability*, pages 100–118, 1975.
- Samuel Gehman, Suchin Gururangan, Maarten Sap, Yejin Choi, and Noah A Smith. Real-toxicityprompts: Evaluating neural toxic degeneration in language models. *arXiv preprint arXiv:2009.11462*, 2020.
- Yuxian Gu, Li Dong, Furu Wei, and Minlie Huang. Minillm: Knowledge distillation of large language models. *arXiv preprint arXiv:2306.08543*, 2023.
- Audrey Huang, Wenhao Zhan, Tengyang Xie, Jason D Lee, Wen Sun, Akshay Krishnamurthy, and Dylan J Foster. Correcting the mythos of kl-regularization: Direct alignment without overoptimization via chi-squared preference optimization. *arXiv preprint arXiv:2407.13399*, 2024.
- Albert Q Jiang, Alexandre Sablayrolles, Arthur Mensch, Chris Bamford, Devendra Singh Chaplot, Diego de las Casas, Florian Bressand, Gianna Lengyel, Guillaume Lample, Lucile Saulnier, et al. Mistral 7b. *arXiv preprint arXiv:2310.06825*, 2023.
- Hung Le, Thommen Karimpanal George, Majid Abdolshah, Dung Nguyen, Kien Do, Sunil Gupta, and Svetha Venkatesh. Learning to constrain policy optimization with virtual trust region. *Advances in Neural Information Processing Systems*, 35:12775–12786, 2022.

378 Hung Le, Quan Tran, Dung Nguyen, Kien Do, Saloni Mittal, Kelechi Ogueji, and Svetha  
379 Venkatesh. Multi-reference preference optimization for large language models. *arXiv preprint*  
380 *arXiv:2405.16388*, 2024.

381 Chris Yuhao Liu, Liang Zeng, Jiakai Liu, Rui Yan, Jujie He, Chaojie Wang, Shuicheng Yan, Yang  
382 Liu, and Yahui Zhou. Skywork-reward: Bag of tricks for reward modeling in llms. *arXiv preprint*  
383 *arXiv:2410.18451*, 2024.

384 Rémi Munos and Csaba Szepesvári. Finite-time bounds for fitted value iteration. *Journal of Machine*  
385 *Learning Research*, 9(5), 2008.

386 Long Ouyang, Jeffrey Wu, Xu Jiang, Diogo Almeida, Carroll Wainwright, Pamela Mishkin, Chong  
387 Zhang, Sandhini Agarwal, Katarina Slama, Alex Ray, et al. Training language models to follow  
388 instructions with human feedback. *Advances in neural information processing systems*, 35:27730–  
389 27744, 2022.

390 Guilherme Penedo, Quentin Malartic, Daniel Hesslow, Ruxandra Cojocaru, Alessandro Cappelli,  
391 Hamza Alobeidli, Baptiste Pannier, Ebtesam Almazrouei, and Julien Launay. The refinedweb  
392 dataset for falcon llm: outperforming curated corpora with web data, and web data only. *arXiv*  
393 *preprint arXiv:2306.01116*, 2023.

394 Rafael Rafailov, Archit Sharma, Eric Mitchell, Stefano Ermon, Christopher D Manning, and Chelsea  
395 Finn. Direct preference optimization: Your language model is secretly a reward model. *arXiv*  
396 *preprint arXiv:2305.18290*, 2023.

397 John Schulman, Filip Wolski, Prafulla Dhariwal, Alec Radford, and Oleg Klimov. Proximal policy  
398 optimization algorithms. *arXiv preprint arXiv:1707.06347*, 2017.

399 Zhihong Shao, Peiyi Wang, Qihao Zhu, Runxin Xu, Junxiao Song, Xiao Bi, Haowei Zhang,  
400 Mingchuan Zhang, YK Li, Y Wu, et al. Deepseekmath: Pushing the limits of mathematical  
401 reasoning in open language models. *arXiv preprint arXiv:2402.03300*, 2024.

402 Arsalan Sharifnassab, Saber Salehkaleybar, Sina Ghiassian, Surya Kanoria, and Dale Schuurmans.  
403 Soft preference optimization: Aligning language models to expert distributions. *arXiv preprint*  
404 *arXiv:2405.00747*, 2024.

405 Yuda Song, Gokul Swamy, Aarti Singh, Drew Bagnell, and Wen Sun. The importance of online data:  
406 Understanding preference fine-tuning via coverage. In *The Thirty-eighth Annual Conference on*  
407 *Neural Information Processing Systems*, 2024.

408 Hao Sun and Mihaela van der Schaar. Inverse-rllignment: Inverse reinforcement learning from  
409 demonstrations for llm alignment. *arXiv preprint arXiv:2405.15624*, 2024.

410 Masatoshi Uehara and Wen Sun. Pessimistic model-based offline reinforcement learning under partial  
411 coverage. *arXiv preprint arXiv:2107.06226*, 2021.

412 Chaoqi Wang, Yibo Jiang, Chenghao Yang, Han Liu, and Yuxin Chen. Beyond reverse kl: Generaliz-  
413 ing direct preference optimization with diverse divergence constraints. In *The Twelfth International*  
414 *Conference on Learning Representations*, 2024a.

415 Zhichao Wang, Bin Bi, Shiva Kumar Pentiyala, Kiran Ramnath, Sougata Chaudhuri, Shubham  
416 Mehrotra, Xiang-Bo Mao, Sitaram Asur, et al. A comprehensive survey of llm alignment techniques:  
417 RLhf, rlaiif, ppo, dpo and more. *arXiv preprint arXiv:2407.16216*, 2024b.

418 Christian Wirth, Riad Akrou, Gerhard Neumann, and Johannes Fürnkranz. A survey of preference-  
419 based reinforcement learning methods. *Journal of Machine Learning Research*, 18(136):1–46,  
420 2017.

421 Mitchell Wortsman, Gabriel Ilharco, Samir Ya Gadre, Rebecca Roelofs, Raphael Gontijo-Lopes,  
422 Ari S Morcos, Hongseok Namkoong, Ali Farhadi, Yair Carmon, Simon Kornblith, et al. Model  
423 soups: averaging weights of multiple fine-tuned models improves accuracy without increasing  
424 inference time. In *International conference on machine learning*, pages 23965–23998. PMLR,  
425 2022.

426 Wei Xiong, Hanze Dong, Chenlu Ye, Ziqi Wang, Han Zhong, Heng Ji, Nan Jiang, and Tong Zhang.  
427 Iterative preference learning from human feedback: Bridging theory and practice for rlhf under  
428 kl-constraint. In *Forty-first International Conference on Machine Learning*, 2024.

429 An Yang, Baosong Yang, Beichen Zhang, Binyuan Hui, Bo Zheng, Bowen Yu, Chengyuan Li,  
430 Dayiheng Liu, Fei Huang, Haoran Wei, et al. Qwen2. 5 technical report. *arXiv preprint*  
431 *arXiv:2412.15115*, 2024.

432 Chenlu Ye, Wei Xiong, Yuheng Zhang, Nan Jiang, and Tong Zhang. A theoretical analysis of  
433 nash learning from human feedback under general kl-regularized preference. *arXiv preprint*  
434 *arXiv:2402.07314*, 2024.

435 Wenhao Zhan, Baihe Huang, Audrey Huang, Nan Jiang, and Jason Lee. Offline reinforcement  
436 learning with realizability and single-policy concentrability. In *Conference on Learning Theory*,  
437 pages 2730–2775. PMLR, 2022.

438 Wenhao Zhan, Masatoshi Uehara, Nathan Kallus, Jason D Lee, and Wen Sun. Provable offline  
439 preference-based reinforcement learning. *arXiv preprint arXiv:2305.14816*, 2023.

440 Heyang Zhao, Chenlu Ye, Quanquan Gu, and Tong Zhang. Sharp analysis for kl-regularized contextual  
441 bandits and rlhf. *arXiv preprint arXiv:2411.04625*, 2024.

442 Daniel M Ziegler, Nisan Stiennon, Jeffrey Wu, Tom B Brown, Alec Radford, Dario Amodei, Paul  
443 Christiano, and Geoffrey Irving. Fine-tuning language models from human preferences. *arXiv*  
444 *preprint arXiv:1909.08593*, 2019.

## 445 A Algorithms

446 The RLHF algorithm with two reference models is shown in Algorithm 1. Furthermore, the forward KL-regularized RLHF algorithm with two reference models is shown in Algorithm 2.

---

### Algorithm 1 Reverse KL-regularized RLHF with Two Reference Models

---

**Require:**  $\gamma, \alpha, \pi_{\text{ref},1}, \pi_{\text{ref},2} \in \Theta$

1: **for**  $i = 1, \dots, m$  **do**

2:   Sample prompt  $\tilde{x}_i \sim \rho$  and 2 responses with their preference  $\tilde{y}_i^w, \tilde{y}_i^l \sim \hat{\pi}_{\alpha, \text{ref}}(\cdot|x) \propto \pi_{\text{ref},1}^\alpha(\cdot|\tilde{x}_i) \pi_{\text{ref},2}^{1-\alpha}(\cdot|\tilde{x}_i)$ .

3: **end for**

4: Compute the MLE estimator of the reward function based on  $D_n = \{(\tilde{x}_i, \tilde{y}_i^w, \tilde{y}_i^l)\}_{i=1}^n$ :

$$\hat{\theta} \leftarrow \arg \max_{\theta} \mathcal{L}(\theta, D_n),$$

5: Compute the RLHF output based on (16):  $\pi_{\hat{\theta}}^\gamma(\cdot|x) \propto \hat{\pi}_{\alpha, \text{ref}}(\cdot|x) \exp(\gamma r_{\hat{\theta}}(\cdot, \cdot))$ .

---

447

---

### Algorithm 2 Forward KL-regularized RLHF with Two Reference Models

---

**Require:**  $\gamma, \beta, \pi_{\text{ref},1}, \pi_{\text{ref},2} \in \Theta$

1: **for**  $i = 1, \dots, m$  **do**

2:   Sample prompt  $\tilde{x}_i \sim \rho$  and 2 responses with their preference  $\tilde{y}_i^w, \tilde{y}_i^l \sim \bar{\pi}_{\beta, \text{ref}}(\cdot|x) = \beta \pi_{\text{ref},1}(\cdot|\tilde{x}_i) + (1 - \beta) \pi_{\text{ref},2}(\cdot|\tilde{x}_i)$ .

3: **end for**

4: Compute the MLE estimator of the reward function based on  $D_n = \{(\tilde{x}_i, \tilde{y}_i^w, \tilde{y}_i^l)\}_{i=1}^n$ :

$$\hat{\theta} \leftarrow \arg \max_{\theta} \mathcal{L}(\theta, D_n)$$

5: Compute the RLHF output based on (20).

---

## 448 B Technical Tools

449 In this section, we introduce the following technical tools and Lemmata.

450 **Lemma B.1** (Lemma C.2 from [Chang et al., 2024]). *Under Assumptions 4.1 and 4.2, we have with*  
 451 *probability at least  $1 - \delta$  that*

$$\begin{aligned} & \mathbb{E}_{Y^l, Y^w \sim \pi_{\text{ref}}, \pi_{\text{ref}}} \left[ \left( r_{\theta^*}(x, Y^l) - r_{\theta^*}(x, Y^w) - r_{\hat{\theta}}(x, Y^l) + r_{\hat{\theta}}(x, Y^w) \right)^2 \right] \\ & \leq \frac{128 R_{\max}^2 \exp(4 R_{\max}) \log(|\mathcal{R}|/\delta)}{n}. \end{aligned} \quad (22)$$

452 **Lemma B.2** ([Boucheron et al., 2013]). *Assume that function  $f(x) \in [0, B]$  is bounded. Then, we*  
 453 *have,*

$$\mathbb{E}_{p(X)}[f(X)] - \mathbb{E}_{q(X)}[f(X)] \leq B \sqrt{\frac{\text{KL}(p(X) \| q(X))}{2}}. \quad (23)$$

454 **Lemma B.3.** *Assume that  $\tilde{\pi}_r(y|x) \propto \pi_{\text{ref}}(y|x) \exp(\gamma r(x, y))$ . Then,  $\tilde{\pi}_{r+\Delta}(y|x) = \tilde{\pi}_r(y|x)$ , where*  
 455  *$\Delta$  is constant.*

*Proof.*

$$\begin{aligned} \tilde{\pi}_{r+\Delta}(y|x) &= \frac{\pi_{\text{ref}}(y|x) \exp(\gamma(r(x, y) + \Delta))}{\mathbb{E}_{Y \sim \pi_{\text{ref}}(Y|x)} [\exp(\gamma(r(x, y) + \Delta))]} \\ &= \frac{\pi_{\text{ref}}(y|x) \exp(\gamma r(x, y))}{\mathbb{E}_{Y \sim \pi_{\text{ref}}(Y|x)} [\exp(\gamma r(x, y))]} \end{aligned} \quad (24)$$

456

□

## C Assumption 4.1 and Assumption 4.2 Discussion

These Assumptions are common literature are common in the literature [Song et al., 2024, Zhan et al., 2023, Zhao et al., 2024, Chang et al., 2024, Xiong et al., 2024]. In particular, Assumption 4.1 is primarily to enable the use of concentration inequalities like Freedman’s inequality [Boucheron et al., 2013], which require bounded differences (as in Lemma B.1). However, this assumption can be relaxed under certain growth conditions, as discussed in [Freedman, 1975]. Moreover, even when the original reward function is unbounded or sub-Gaussian—as is often the case in human preference modeling—it is possible to apply a monotonic, bounded transformation to the rewards. For instance, one can use the cumulative distribution function (CDF) of the reward under a reference model to normalize the rewards into a bounded range, as proposed in [Balashankar et al., 2025]. This approach also retains the essential ordering of preferences and supports handling sub-Gaussian behavior in the transformed space. Regarding finite class, we can apply covering number and relax this assumption as utilized in [Zhao et al., 2024]

## D Proofs and Details of Section 5

**Lemma D.1.** Let  $\alpha_i \in [0, 1]$  for all  $i \in [k]$  and  $\sum_{i=1}^k \alpha_i = 1$ . For any distributions  $Q_i$  for all  $i \in [k]$  and  $P$  over the space  $\mathcal{X}$ , such that  $P \ll Q_i$ , we have

$$\sum_{i=1}^k \alpha_i \text{KL}(P \| Q_i) = \text{KL}\left(P \| \left(\{Q_i\}_{i=1}^k\right)^\alpha\right) - \log \left( \sum_{x \in \mathcal{A}} \prod_{i=1}^k Q_i^{\alpha_i}(x) \right).$$

*Proof.* We have

$$\begin{aligned} \sum_{i=1}^k \alpha_i \text{KL}(P \| Q_i) &= \sum_{i=1}^k \alpha_i \left( \sum_{x \in \mathcal{A}} P(x) \log \left( \frac{P(x)}{Q_i(x)} \right) \right) \\ &= \sum_{x \in \mathcal{A}} \sum_{i=1}^k P(x) \log \left( \frac{P^{\alpha_i}(x)}{Q_i^{\alpha_i}(x)} \right) \\ &= \sum_{x \in \mathcal{A}} P(x) \log \left( \frac{P(x)}{\prod_{i=1}^k Q_i^{\alpha_i}(x)} \right) \\ &= \text{KL}\left(P \| \left(\{Q_i\}_{i=1}^k\right)^\alpha\right) - \log \left( \sum_{x \in \mathcal{A}} \prod_{i=1}^k Q_i^{\alpha_i}(x) \right). \end{aligned}$$

□

**Lemma D.2.** Let  $\mathcal{A}$  be an arbitrary set and function  $f : \mathcal{A} \rightarrow \mathbb{R}$  be such that

$$\int_{x \in \mathcal{A}} \exp \left( -\frac{f(x)}{\lambda} \right) Q_X(x) dx < \infty.$$

Then for any  $P_X$  defined on  $\mathcal{A}$  such that  $X \sim P_X$ , we have

$$\mathbb{E}[f(X)] + \lambda \text{KL}(P_X \| Q_X) = \lambda \text{KL}(P_X \| P_X^{\text{Gibbs}}) - \lambda \log \left( \int_{x \in \mathcal{A}} \exp \left( -\frac{f(x)}{\lambda} \right) Q_X(x) dx \right),$$

where

$$P_X^{\text{Gibbs}}(x) := \frac{\exp \left( -\frac{f(x)}{\lambda} \right) Q_X(x)}{\int_{x \in \mathcal{A}} \exp \left( -\frac{f(x)}{\lambda} \right) Q_X(x) dx}, \quad x \in \mathcal{A},$$

is the Gibbs–Boltzmann distribution.



475 *Proof.* We have

$$\begin{aligned}
\mathbb{E}[f(X)] + \lambda \text{KL}(P_X \| Q_X) &= \int f(x) P_X(x) dx + \lambda \int P_X(x) \log \left( \frac{P_X(x)}{Q_X(x)} \right) \\
&= \lambda \int P_X(x) \log \left( \frac{P_X(x)}{\exp \left( -\frac{f(x)}{\lambda} \right) Q_X(x)} \right) \\
&= \lambda \text{KL}(P_X \| P_X^{\text{Gibbs}}) - \lambda \log \left( \int_{x \in \mathcal{A}} \exp \left( -\frac{f(x)}{\lambda} \right) Q_X(x) dx \right).
\end{aligned}$$

476 □

**Theorem 5.1.** Consider the following objective function for RLHF with multiple reference models,

$$\max_{\pi} \left\{ \mathbb{E}_{Y \sim \pi(\cdot|x)} [r_{\theta^*}(x, Y)] - \frac{1}{\gamma} \left( \sum_{i=1}^K \alpha_i \text{KL}(\pi(\cdot|x) \| \pi_{\text{ref},i}(\cdot|x)) \right) \right\},$$

where  $\sum_{i=1}^K \alpha_i = 1$  and  $\alpha_i \in (0, 1)$  for  $i \in [K]$ . Then, the exact solution of the multiple reference models objective function for RLHF is,

$$\pi_{\theta^*}^{\gamma}(y|x) = \frac{\hat{\pi}_{\mathbf{\alpha}, \text{ref}}(y|x)}{\hat{Z}(x)} \exp \left( \gamma r_{\theta^*}(x, y) \right), \quad (25)$$

where

$$\hat{\pi}_{\mathbf{\alpha}, \text{ref}}(y|x) = \frac{\prod_{i=1}^K \pi_{\text{ref},i}^{\alpha_i}(y|x)}{F_{\mathbf{\alpha}}(x)},$$

$$F_{\mathbf{\alpha}}(x) = \sum_{y \in \mathcal{Y}} \prod_{i=1}^K \pi_{\text{ref},i}^{\alpha_i}(y|x),$$

and

$$\hat{Z}(x) = \sum_y \hat{\pi}_{\mathbf{\alpha}, \text{ref}}(y|x) \exp \left( \gamma r(x, y) \right).$$

The maximum objective value is

$$\frac{1}{\gamma} \log \left( \sum_y \prod_{i=1}^K \pi_{\text{ref},i}^{\alpha_i}(y|x) \exp \left( \gamma r(x, y) \right) \right).$$

477

478 *Proof.* We can write

$$\begin{aligned} & \mathbb{E}_{Y \sim \pi(\cdot|x)} [r_{\theta^*}(x, Y)] - \frac{1}{\gamma} \left( \sum_{i=1}^K \alpha_i \text{KL}(\pi(\cdot|x) \parallel \pi_{\text{ref},i}(\cdot|x)) \right) \\ &= \frac{1}{\gamma} \left( \gamma \mathbb{E}_{Y \sim \pi(\cdot|x)} [r_{\theta^*}(x, Y)] - \left( \sum_{i=1}^K \alpha_i \text{KL}(\pi(\cdot|x) \parallel \pi_{\text{ref},i}(\cdot|x)) \right) \right) \end{aligned} \quad (26)$$

$$= \frac{1}{\gamma} \left( \gamma \mathbb{E}_{Y \sim \pi(\cdot|x)} [r_{\theta^*}(x, Y)] - \text{KL}(\pi(\cdot|x) \parallel \hat{\pi}_{\mathbf{a}, \text{ref}}(y|x)) + \log F_{\mathbf{a}}(x) \right) \quad (27)$$

$$= \frac{1}{\gamma} \left( -\text{KL}(\pi(\cdot|x) \parallel \pi_{\theta^*}^{\gamma}(y|x)) + \log \hat{Z}(x) + \log F_{\mathbf{a}}(x) \right) \quad (28)$$

$$= \frac{1}{\gamma} \left( -\text{KL}(\pi(\cdot|x) \parallel \pi_{\theta^*}^{\gamma}(y|x)) + \log \left( \sum_y \prod_{i=1}^K \pi_{\text{ref},i}^{\alpha_i}(y|x) \exp(\gamma r(x, y)) \right) \right), \quad (29)$$

479 where (27) follows from Lemma D.1 and (28) follows from Lemma D.2. Clearly, the  
 480 right side of (29) is maximized when the KL divergence is set to zero. Thus, the max-  
 481 imizing distribution  $\pi(\cdot|x)$  is identical to  $\pi_{\theta^*}^{\gamma}(y|x)$ , and the maximum objective value is  
 482  $\frac{1}{\gamma} \log \left( \sum_y \prod_{i=1}^K \pi_{\text{ref},i}^{\alpha_i}(y|x) \exp(\gamma r(x, y)) \right)$ .  $\square$

**Corollary D.3.** *Weighted multiple single reverse KL-regularized RLHF problem is an upper bound on multiple references reverse KL-regularized RLHF problem, i.e.,*

$$\begin{aligned} & \max_{\pi} \left\{ \mathbb{E}_{Y \sim \pi(\cdot|x)} [r_{\theta^*}(x, Y)] - \frac{1}{\gamma} \left( \sum_{i=1}^K \alpha_i \text{KL}(\pi(\cdot|x) \parallel \pi_{\text{ref},i}(\cdot|x)) \right) \right\} \\ & \leq \sum_{i=1}^K \alpha_i \max_{\pi} \left\{ \mathbb{E}_{Y \sim \pi(\cdot|x)} [r_{\theta^*}(x, Y)] - \frac{1}{\gamma} \left( \text{KL}(\pi(\cdot|x) \parallel \pi_{\text{ref},i}(\cdot|x)) \right) \right\}. \end{aligned} \quad (30)$$

483

484 *Proof.* It can be shown that the maximum of objective function in Theorem 5.1 is,

$$\begin{aligned} & \max_{\pi} \left\{ \mathbb{E}_{Y \sim \pi(\cdot|x)} [r_{\theta^*}(x, Y)] - \frac{1}{\gamma} \left( \sum_{i=1}^K \alpha_i \text{KL}(\pi(\cdot|x) \parallel \pi_{\text{ref},i}(\cdot|x)) \right) \right\} \\ &= \frac{1}{\gamma} \log \left( \mathbb{E}_{Y \sim \hat{\pi}_{\mathbf{a}, \text{ref}}(y|x)} [\exp(\gamma r_{\theta^*}(x, Y))] \right) + \frac{1}{\gamma} \log F_{\mathbf{a}}(x) \\ &= \frac{1}{\gamma} \log \left( \sum_y \prod_{i=1}^K \pi_{\text{ref},i}^{\alpha_i}(y|x) \exp(\alpha_i \gamma r_{\theta^*}(x, y)) \right) \\ &\leq \sum_{i=1}^K \frac{\alpha_i}{\gamma} \log \left( \sum_y \pi_{\text{ref},i}(y|x) \exp(\gamma r_{\theta^*}(x, y)) \right), \end{aligned} \quad (31)$$

485 where the last inequality follows from Hölder's inequality. Note that,

$$\begin{aligned} & \max_{\pi} \left\{ \mathbb{E}_{Y \sim \pi(\cdot|x)} [r_{\theta^*}(x, Y)] - \frac{1}{\gamma} \left( \text{KL}(\pi(\cdot|x) \parallel \pi_{\text{ref},i}(\cdot|x)) \right) \right\} \\ &= \frac{1}{\gamma} \log \left( \sum_y \pi_{\text{ref},i}(y|x) \exp(\gamma r_{\theta^*}(x, Y)) \right). \end{aligned} \quad (32)$$

486 Then, we have,

$$\begin{aligned} & \max_{\pi} \left\{ \mathbb{E}_{Y \sim \pi(\cdot|x)} [r_{\theta^*}(x, Y)] - \frac{1}{\gamma} \left( \sum_{i=1}^K \alpha_i \text{KL}(\pi(\cdot|x) \| \pi_{\text{ref},i}(\cdot|x)) \right) \right\} \\ & \leq \sum_{i=1}^K \alpha_i \max_{\pi} \left\{ \mathbb{E}_{Y \sim \pi(\cdot|x)} [r_{\theta^*}(x, Y)] - \frac{1}{\gamma} \left( \text{KL}(\pi(\cdot|x) \| \pi_{\text{ref},i}(\cdot|x)) \right) \right\} \end{aligned} \quad (33)$$

487 Therefore, multiple single RLHF problem is an upper bound on multiple reference models RLHF  
488 problem.  $\square$

489 **Remark D.4** (Choosing  $\alpha$ ). The optimum  $\alpha$  for a given  $x$ , can be derived from the following  
490 optimization problem,

$$\max_{\alpha} \frac{1}{\gamma} \log \left( \sum_y \prod_{i=1}^K \pi_{\text{ref},i}^{\alpha_i}(y|x) \exp(\alpha_i \gamma r_{\theta^*}(x, y)) \right). \quad (34)$$

**Proposition D.5.** For a given response,  $x \in \mathcal{X}$ , the following upper bound holds,

$$\mathcal{J}^{\gamma}(\pi_{\theta^*}^{\gamma}(\cdot|x), \pi_{\hat{\theta}}^{\gamma}(\cdot|x)) \leq \int_{\mathcal{Y}} (r_{\theta^*}(x, y) - r_{\hat{\theta}}(x, y)) (\pi_{\theta^*}^{\gamma}(y|x) - \pi_{\hat{\theta}}^{\gamma}(y|x)) (dy).$$

491

492 *Proof.* Note that  $\text{KL}(\pi(\cdot|x) \| \hat{\pi}_{\alpha, \text{ref}}(\cdot|x))$  is a convex function with respect to  $\pi(\cdot|x)$ . Therefore,  
493  $J_{\gamma}(\hat{\pi}_{\alpha, \text{ref}}(\cdot|x), \pi(\cdot|x))$  is a concave function with respect to  $\pi(\cdot|x)$ . First, we compute the functional  
494 derivative of  $J_{\gamma}(\hat{\pi}_{\alpha, \text{ref}}(\cdot|x), \pi(\cdot|x))$  with respect to  $\pi(\cdot|x)$ ,

$$\frac{\delta J_{\gamma}(\hat{\pi}_{\alpha, \text{ref}}(\cdot|x), \pi(\cdot|x))}{\delta \pi} = r_{\theta^*}(x, y) - \frac{1}{\gamma} \log(\pi(\cdot|x) / \hat{\pi}_{\alpha, \text{ref}}(\cdot|x)) + \frac{1}{\gamma}. \quad (35)$$

495 Therefore, we have,

$$\begin{aligned} & \mathcal{J}^{\gamma}(\pi_{\theta^*}^{\gamma}(\cdot|x), \pi_{\hat{\theta}}^{\gamma}(\cdot|x)) = \\ & J_{\gamma}(\hat{\pi}_{\alpha, \text{ref}}(\cdot|x), \pi_{\theta^*}^{\gamma}(\cdot|x)) - J_{\gamma}(\hat{\pi}_{\alpha, \text{ref}}(\cdot|x), \pi_{\hat{\theta}}^{\gamma}(\cdot|x)) \\ & \leq \int_{\mathcal{Y}} \frac{\delta J_{\gamma}(\hat{\pi}_{\alpha, \text{ref}}(\cdot|x), \pi_{\hat{\theta}}^{\gamma}(y|x))}{\delta \pi} (\pi_{\theta^*}^{\gamma}(y|x) - \pi_{\hat{\theta}}^{\gamma}(y|x)) (dy) \\ & = \int_{\mathcal{Y}} \left( r_{\theta^*}(x, y) - \frac{1}{\gamma} \log(\pi_{\hat{\theta}}^{\gamma}(y|x) / \hat{\pi}_{\alpha, \text{ref}}(\cdot|x)) + \frac{1}{\gamma} \right) (\pi_{\theta^*}^{\gamma}(y|x) - \pi_{\hat{\theta}}^{\gamma}(y|x)) (dy) \\ & = \int_{\mathcal{Y}} \left( r_{\theta^*}(x, y) - r_{\hat{\theta}}(x, y) + \frac{1}{\gamma} \log(Z(x)) \right) (\pi_{\theta^*}^{\gamma}(y|x) - \pi_{\hat{\theta}}^{\gamma}(y|x)) (dy) \\ & = \int_{\mathcal{Y}} (r_{\theta^*}(x, y) - r_{\hat{\theta}}(x, y)) (\pi_{\theta^*}^{\gamma}(y|x) - \pi_{\hat{\theta}}^{\gamma}(y|x)) (dy). \end{aligned} \quad (36)$$

496 It completes the proof.  $\square$

**Lemma D.6.** Consider the softmax policy,  $\pi_r^{\gamma}(y|x) \propto \hat{\pi}_{\alpha, \text{ref}}(y|x) \exp(\gamma r(x, y))$ . Then, the sensitivity of the policy with respect to reward function is,

$$\frac{\partial \pi_r^{\gamma}}{\partial r}(r) = \gamma \pi_r^{\gamma}(y|x) (1 - \pi_r^{\gamma}(y|x)).$$

497

498 *Proof.* We have  $\pi_r^{\gamma}(y|x) = \frac{\hat{\pi}_{\alpha, \text{ref}}(y|x) \exp(\gamma r(x, y))}{\mathbb{E}_{Y \sim \hat{\pi}_{\alpha, \text{ref}}(\cdot|x)} [\exp(\gamma r(x, Y))]}$ . Using Chain rule, we have,

$$\begin{aligned} \frac{\partial \pi_r^{\gamma}}{\partial r}(r) &= \gamma \frac{\hat{\pi}_{\alpha, \text{ref}}(y|x) \exp(\gamma r(x, y))}{\mathbb{E}_{Y \sim \hat{\pi}_{\alpha, \text{ref}}(\cdot|x)} [\exp(\gamma r(x, Y))]} - \frac{\gamma \hat{\pi}_{\alpha, \text{ref}}(y|x)^2 \exp(2\gamma r(x, y))}{\mathbb{E}_{Y \sim \hat{\pi}_{\alpha, \text{ref}}(\cdot|x)} [\exp(\gamma r(x, Y))]^2} \\ &= \gamma \pi_r^{\gamma}(y|x) (1 - \pi_r^{\gamma}(y|x)). \end{aligned} \quad (37)$$

**Theorem 5.2.** Under Assumption 4.1, 4.2 and 4.4, the following upper bound holds on the sub-optimality gap with probability at least  $(1 - \delta)$  for  $\delta \in (0, 1/2)$ ,

$$\begin{aligned} & \mathcal{J}^\gamma(\pi_{\theta^*}^\gamma(\cdot|x), \pi_{\hat{\theta}}^\gamma(\cdot|x)) \\ & \leq \gamma C_{\alpha, \varepsilon_{\text{rkl}}} 128 e^{4R_{\max}} R_{\max}^2 \frac{\log(|\mathcal{R}|/\delta)}{n}. \end{aligned}$$

500

501 *Proof.* Using Proposition D.5, we have,

$$\begin{aligned} & \mathcal{J}^\gamma(\pi_{\theta^*}^\gamma(\cdot|x), \pi_{\hat{\theta}}^\gamma(\cdot|x)) \\ & \leq \int_{\mathcal{Y}} (r_{\theta^*}(x, y) - r_{\hat{\theta}}(x, y)) (\pi_{\theta^*}^\gamma(y|x) - \pi_{\hat{\theta}}^\gamma(y|x)) (dy). \end{aligned} \quad (38)$$

502 Note that, as the integral in (38) is over  $\mathcal{Y}$ , therefore, we have,

$$\begin{aligned} & \mathcal{J}^\gamma(\pi_{\theta^*}^\gamma(\cdot|x), \pi_{\hat{\theta}}^\gamma(\cdot|x)) \\ & \leq \int_{\mathcal{Y}} (r_{\theta^*}(x, y) - r_{\hat{\theta}}(x, y) - h(x)) (\pi_{\theta^*}^\gamma(y|x) - \pi_{\hat{\theta}}^\gamma(y|x)) (dy), \end{aligned} \quad (39)$$

503 where  $h(x)$  is an arbitrary function over  $\mathcal{X}$ . Note that  $\pi_{\theta^*}^\gamma(y|x)$  and  $\pi_{\hat{\theta}}^\gamma(y|x)$  are function of  $r_{\theta^*}(x, y)$   
504 and  $r_{\hat{\theta}}(x, y)$ , respectively. Furthermore, softmax policies are shift invariant, Lemma B.3, i.e.,  
505  $\pi_{\theta^*}^\gamma(y|x) \propto \hat{\pi}_{\alpha, \text{ref}}(\cdot|x) \exp(\gamma(r_{\theta^*}(x, y) - h(x)))$  where  $h(x)$  is a function dependent on  $x$ . Therefore,  
506 we can apply the mean-value theorem to  $(\pi_{\theta^*}^\gamma(y|x) - \pi_{\hat{\theta}}^\gamma(y|x)) (dy)$  with respect to reward function  
507  $r(x, y)$ . Therefore, we have for a given  $h(x)$ ,

$$\begin{aligned} (\pi_{\theta^*}^\gamma(y|x) - \pi_{\hat{\theta}}^\gamma(y|x)) &= \frac{\partial \pi(\cdot|x)}{\partial r} (r_\lambda) (r_{\theta^*}(x, y) - r_{\hat{\theta}}(x, y) - h(x)) \\ &= \gamma \pi_{r_\lambda}(\cdot|x) (1 - \pi_{r_\lambda}(\cdot|x)) (r_{\theta^*}(x, y) - r_{\hat{\theta}}(x, y) - h(x)), \end{aligned} \quad (40)$$

508 where  $r_\lambda = \lambda(r_{\theta^*}(x, y) - h(x)) + (1 - \lambda)r_{\hat{\theta}}(x, y)$  for some  $\lambda \in [0, 1]$  and  $\pi_{r_\lambda}(\cdot|x) \propto$   
509  $\hat{\pi}_{\alpha, \text{ref}}(\cdot|x) \exp(\gamma r_\lambda(x, y))$ . Applying (40) in (39), we have,

$$\begin{aligned} & \mathcal{J}^\gamma(\pi_{\theta^*}^\gamma(\cdot|x), \pi_{\hat{\theta}}^\gamma(\cdot|x)) \\ & \leq \gamma \int_{\mathcal{Y}} (r_{\theta^*}(x, y) - r_{\hat{\theta}}(x, y))^2 \pi_{r_\lambda}(\cdot|x) (1 - \pi_{r_\lambda}(\cdot|x)) (dy) \\ & \leq \gamma \int_{\mathcal{Y}} (r_{\theta^*}(x, y) - r_{\hat{\theta}}(x, y))^2 \pi_{r_\lambda}(\cdot|x) (dy) \\ & \leq C_{\alpha, \varepsilon_{\text{rkl}}} \gamma \int_{\mathcal{Y}} (r_{\theta^*}(x, y) - r_{\hat{\theta}}(x, y) - h(x))^2 \hat{\pi}_{\alpha, \text{ref}}(\cdot|x) (dy). \end{aligned} \quad (41)$$

510 Choosing  $h(x) = \mathbb{E}_{Y^l \sim \hat{\pi}_{\alpha, \text{ref}}(\cdot|x)} [r_{\theta^*}(x, Y^l) - r_{\hat{\theta}}(x, Y^l)]$ , applying Jensen inequality and Lemma B.1,  
511 we have,

$$\begin{aligned} & \mathcal{J}^\gamma(\pi_{\theta^*}^\gamma(\cdot|x), \pi_{\hat{\theta}}^\gamma(\cdot|x)) \\ & \leq C_{\alpha, \varepsilon_{\text{rkl}}} \gamma \int_{\mathcal{Y}} (r_{\theta^*}(x, y^w) - r_{\hat{\theta}}(x, y^w) - r_{\theta^*}(x, y^l) + r_{\hat{\theta}}(x, y^l))^2 \hat{\pi}_{\alpha, \text{ref}}(\cdot|x) (dy^l) \hat{\pi}_{\alpha, \text{ref}}(\cdot|x) (dy^w) \\ & \leq \gamma C_{\alpha, \varepsilon_{\text{rkl}}} 128 e^{4R_{\max}} R_{\max}^2 \frac{\log(|\mathcal{R}|/\delta)}{n}. \end{aligned} \quad (42)$$

512 This completes the proof. □

**Theorem 5.3.** Under Assumption 4.1, 4.2 and 4.4, there exists constant  $C > 0$  such that the following upper bound holds on the optimality gap of the reverse KL-regularized RLHF with probability at least  $(1 - \delta)$  for  $\delta \in (0, 1/2)$ ,

$$\begin{aligned} \mathcal{J}(\pi_{\theta^*}^\gamma(\cdot|x), \pi_\theta^\gamma(\cdot|x)) &\leq \gamma C_{\alpha, \varepsilon_{\text{rkl}}} 128 e^{4R_{\max}} R_{\max}^2 \frac{\log(|\mathcal{R}|/\delta)}{n} \\ &\quad + C 8 R_{\max} e^{2R_{\max}} \sqrt{\frac{2C_{\alpha, \varepsilon_{\text{rkl}}} \log(|\mathcal{R}|/\delta)}{n}}. \end{aligned}$$

513

514 *Proof.* We have the following decomposition of the optimality gap,

$$\mathcal{J}(\pi_{\theta^*}^\gamma(\cdot|x), \pi_\theta^\gamma(\cdot|x)) = \mathcal{J}^\gamma(\pi_{\theta^*}^\gamma(\cdot|x), \pi_\theta^\gamma(\cdot|x)) + \frac{\text{KL}(\pi_{\theta^*}^\gamma(\cdot|x) \parallel \hat{\pi}_{\alpha, \text{ref}}(\cdot|x)) - \text{KL}(\pi_\theta^\gamma(\cdot|x) \parallel \hat{\pi}_{\alpha, \text{ref}}(\cdot|x))}{\gamma}. \quad (43)$$

515 Now, we provide an upper bound on the second term using Lemma D.6 and a similar approach for  
516 choosing  $h(x)$  in the proof of Theorem 5.2, we have for some  $\lambda \in [0, 1]$ ,

$$\begin{aligned} &\text{KL}(\pi_{\theta^*}^\gamma(\cdot|x) \parallel \hat{\pi}_{\alpha, \text{ref}}(\cdot|x)) - \text{KL}(\pi_\theta^\gamma(\cdot|x) \parallel \hat{\pi}_{\alpha, \text{ref}}(\cdot|x)) \\ &= \int_{\mathcal{Y}} \frac{\partial \pi}{\partial r}(r_\lambda) \left( \log \left( \frac{\pi_{r_\lambda}(\cdot|x)}{\hat{\pi}_{\alpha, \text{ref}}(\cdot|x)} \right) + 1 \right) (r_{\theta^*}(x, y) - r_\theta(x, y) - h(x)) (dy) \\ &= \gamma \int_{\mathcal{Y}} \pi_{r_\lambda}(\cdot|x) (1 - \pi_{r_\lambda}(\cdot|x)) \left( \log \left( \frac{\pi_{r_\lambda}(\cdot|x)}{\hat{\pi}_{\alpha, \text{ref}}(\cdot|x)} \right) + 1 \right) (r_{\theta^*}(x, y) - r_\theta(x, y) - h(x)) (dy) \\ &\leq \gamma \sqrt{\int_{\mathcal{Y}} (1 - \pi_{r_\lambda}(\cdot|x))^2 \left( \log \left( \frac{\pi_{r_\lambda}(\cdot|x)}{\hat{\pi}_{\alpha, \text{ref}}(\cdot|x)} \right) + 1 \right)^2 (dy)} \\ &\quad \times \sqrt{\int_{\mathcal{Y}} \pi_{r_\lambda}(\cdot|x)^2 (r_{\theta^*}(x, y) - r_\theta(x, y) - h(x))^2 (dy)}, \end{aligned} \quad (44)$$

517 where, in the last inequality, we applied the Cauchy–Schwarz inequality. Using the fact that  $\pi_{r_\lambda} \propto$   
518  $\hat{\pi}_{\alpha, \text{ref}}(\cdot|x) \exp(\gamma r_\lambda)$  and Lemma B.1, we have,

$$\begin{aligned} &\text{KL}(\pi_{\theta^*}^\gamma(\cdot|x) \parallel \hat{\pi}_{\alpha, \text{ref}}(\cdot|x)) - \text{KL}(\pi_\theta^\gamma(\cdot|x) \parallel \hat{\pi}_{\alpha, \text{ref}}(\cdot|x)) \\ &\leq \gamma 8 (2\gamma R_{\max} + 1) R_{\max} \exp(2R_{\max}) \sqrt{\frac{2C_{\alpha, \varepsilon_{\text{rkl}}} \log(|\mathcal{R}|/\delta)}{n}}. \end{aligned} \quad (45)$$

519 The final result holds by applying the union bound.  $\square$

520 In the following, we compare the RLHF objective function under the multiple reference model policy,  
521  $\hat{\pi}_{\alpha, \text{ref}}(\cdot|x)$ , with  $i$ -th reference model,  $\pi_{\text{ref}, i}(\cdot|x)$ . For this purpose, we bound the difference between  
522 these two RLHF objective functions in different scenarios.

**Proposition D.7.** Under Assumption 4.1, the following upper bound holds,

$$\tilde{J}_\gamma(\pi_{\alpha, \text{ref}}, \pi_{\theta^*}^\gamma) - \tilde{J}_\gamma(\pi_{\text{ref}, i}, \pi_{\theta^*, i}^\gamma) \leq \frac{\exp(\gamma R_{\max}) - 1}{\gamma \sqrt{2}} \sqrt{\text{KL}(\pi_{\alpha, \text{ref}}(\cdot|x) \parallel \pi_{\text{ref}, i}(\cdot|x))}.$$

523

524 *Proof.* Note that, for a policy  $\pi_{\text{ref}}$  we have,

$$\tilde{J}_\gamma(\pi_{\text{ref}}, \pi_{\theta^*}^\gamma) = \frac{1}{\gamma} \log \left[ \mathbb{E}_{\pi_{\text{ref}}} [\exp(\gamma r_{\theta^*}(x, y))] \right]. \quad (46)$$

525 Therefore, using the functional derivative, we have,

$$\begin{aligned}
& \tilde{J}_\gamma(\pi_{\mathbf{\alpha},\text{ref}}, \pi_{\theta^*}^\gamma) - \tilde{J}_\gamma(\pi_{\text{ref},i}, \pi_{\theta^*,i}^\gamma) \\
&= \frac{1}{\gamma} \log \left[ \mathbb{E}_{\pi_{\mathbf{\alpha},\text{ref}}} [\exp(\gamma r_{\theta^*}(x, y))] \right] - \frac{1}{\gamma} \log \left[ \mathbb{E}_{\pi_{\text{ref},i}} [\exp(\gamma r_{\theta^*}(x, y))] \right] \\
&= \frac{1}{\gamma} \int_0^1 \int_{\mathcal{Y}} \frac{\exp(\gamma r_{\theta^*}(x, y))}{\mathbb{E}_{\pi_{\text{ref},\lambda}} [\exp(\gamma r_{\theta^*}(x, y))]} (\pi_{\mathbf{\alpha},\text{ref}} - \pi_{\text{ref},i})(dy) d\lambda \\
&= \frac{1}{\gamma} \int_0^1 \frac{1}{\mathbb{E}_{\pi_{\text{ref},\lambda}} [\exp(\gamma r_{\theta^*}(x, y))]} \int_{\mathcal{Y}} \exp(\gamma r_{\theta^*}(x, y)) (\pi_{\mathbf{\alpha},\text{ref}} - \pi_{\text{ref},i})(dy) d\lambda \\
&\leq \frac{\exp(\gamma R_{\max}) - 1}{\gamma} \sqrt{\frac{\text{KL}(\pi_{\mathbf{\alpha},\text{ref}}(\cdot|x) \parallel \pi_{\text{ref},i}(\cdot|x))}{2}},
\end{aligned} \tag{47}$$

526 where  $\pi_{\text{ref},\lambda} = \pi_{\text{ref},i} + \lambda(\pi_{\mathbf{\alpha},\text{ref}} - \pi_{\text{ref},i})$  and the last inequality holds due to Lemma B.2.  $\square$



**Lemma E.1.** Let  $\beta_i \in [0, 1]$  for all  $i \in [k]$  and  $\sum_{i=1}^k \beta_i = 1$ . For any distributions  $Q_i$  for all  $i \in [k]$  and  $R$  such that  $Q_i \ll P$ , we have

$$\sum_{i=1}^k \beta_i \text{KL}(Q_i \| P) = H\left(\sum_{i=1}^k \beta_i Q_i\right) - \sum_{i=1}^k \beta_i H(Q_i) + \text{KL}\left(\sum_{i=1}^k \beta_i Q_i \| P\right).$$

528

529 *Proof.* We have,

$$\sum_{i=1}^k \beta_i \text{KL}(Q_i \| P) \tag{48}$$

$$\begin{aligned} &= \sum_{i=1}^k \beta_i Q_i \log(Q_i) - \beta_i Q_i \log(P) \\ &= - \sum_{i=1}^k \beta_i H(Q_i) + \left(\sum_{i=1}^k \beta_i Q_i\right) \log\left(\sum_{i=1}^k \beta_i Q_i\right) - \left(\sum_{i=1}^k \beta_i Q_i\right) \log\left(\sum_{i=1}^k \beta_i Q_i\right) - \left(\sum_{i=1}^k \beta_i Q_i\right) \log(P) \end{aligned} \tag{49}$$

$$= H\left(\sum_{i=1}^k \beta_i Q_i\right) - \sum_{i=1}^k \beta_i H(Q_i) + \left(\sum_{i=1}^k \beta_i Q_i\right) \log\left(\sum_{i=1}^k \beta_i Q_i\right) - \left(\sum_{i=1}^k \beta_i Q_i\right) \log(P) \tag{50}$$

$$= H\left(\sum_{i=1}^k \beta_i Q_i\right) - \sum_{i=1}^k \beta_i H(Q_i) + \text{KL}\left(\sum_{i=1}^k \beta_i Q_i \| P\right). \tag{51}$$

530 □

**Theorem 6.1.** Consider the following objective function for RLHF with multiple reference models,

$$\max_{\pi} \mathbb{E}_{Y \sim \pi(\cdot|x)} [r_{\theta^*}(x, Y)] - \frac{1}{\gamma} \left( \sum_{i=1}^K \beta_i \text{KL}(\pi_{\text{ref},i}(\cdot|x) \| \pi(\cdot|x)) \right),$$

where  $\sum_{i=1}^K \beta_i = 1$  and  $\beta_i \in (0, 1)$  for  $i \in [K]$ . Then, the implicit solution of the multiple reference models objective function for RLHF is,

$$\tilde{\pi}_{\theta^*}^{\gamma}(y|x) = \frac{\bar{\pi}_{\beta, \text{ref}}(y|x)}{\gamma(\tilde{Z}_{\theta^*}(x) - r_{\theta^*}(x, y))},$$

where

$$\bar{\pi}_{\beta, \text{ref}}(y|x) = \sum_{i=1}^K \beta_i \pi_{\text{ref},i}(y|x),$$

and  $\tilde{Z}_{\theta^*}(x)$  is the solution to  $\int_{y \in \mathcal{Y}} \tilde{\pi}_{\theta^*}^{\gamma}(y|x) = 1$  for a given  $x \in \mathcal{X}$ .

531

532 *Proof.* Using Lemma E.1, the objective function of forward KL-regularization under multiple refer-  
533 ence model can be represented as,

$$\max_{\pi} \mathbb{E}_{Y \sim \pi(\cdot|x)} [r_{\theta^*}(x, Y)] - \frac{1}{\gamma} \text{KL}(\bar{\pi}_{\beta, \text{ref}}(\cdot|x) \| \pi(\cdot|x)),$$

534 where  $\bar{\pi}_{\beta, \text{ref}}(y|x) = \sum_{i=1}^K \beta_i \pi_{\text{ref},i}(y|x)$ . As the function is a concave function with respect to  $\pi(\cdot|x)$ ,  
535 we can compute the derivative with respect to  $\pi(\cdot|x)$ . Therefore, using the functional derivative

under the constraint that  $\pi(\cdot|x)$  is a probability measure with Lagrange multiplier,  $\tilde{Z}_{\theta^*}(x)$ , we have at optimal solution that,

$$r_{\theta^*}(x, y) + \frac{1}{\gamma} \frac{\bar{\pi}_{\boldsymbol{\beta}, \text{ref}}(y|x)}{\tilde{\pi}_{\theta^*}^\gamma(y|x)} - \tilde{Z}_{\theta^*}(x) = 0. \quad (52)$$

Solving (52) results in the final solution,  $\tilde{\pi}_{\theta^*}^\gamma(y|x)$ .  $\square$

**Corollary E.2.** *Weighted multiple single forward KL-regularized RLHF problem is an upper bound on multiple references forward KL-regularized RLHF problem, i.e.,*

$$\begin{aligned} & \max_{\pi} \left\{ \mathbb{E}_{Y \sim \pi(\cdot|x)} [r_{\theta^*}(x, Y)] - \frac{1}{\gamma} \left( \sum_{i=1}^K \beta_i \text{KL}(\pi_{\text{ref}, i}(\cdot|x) \parallel \pi(\cdot|x)) \right) \right\} \\ & \leq \sum_{i=1}^K \beta_i \max_{\pi} \left\{ \mathbb{E}_{Y \sim \pi(\cdot|x)} [r_{\theta^*}(x, Y)] - \frac{1}{\gamma} \left( \text{KL}(\pi_{\text{ref}, i}(\cdot|x) \parallel \pi(\cdot|x)) \right) \right\}. \end{aligned} \quad (53)$$

*Proof.* It holds due to maximum function property.  $\square$

Assuming,

$$\tilde{\pi}_{\theta^*}^\gamma(y|x) = \frac{\bar{\pi}_{\boldsymbol{\beta}, \text{ref}}(y|x)}{\gamma(\tilde{Z}_{\theta^*}(x) - r_{\theta^*}(x, y))},$$

we can provide the following property of  $\tilde{Z}_{\theta^*}(x)$ , inspired by [Cohen, 2017].

**Lemma E.3.** *The following property holds for  $\tilde{Z}_{\theta^*}(x)$ ,*

- *For any  $x \in \mathcal{X}$  where  $\rho(x) > 0$ , we have  $\sup_{y \in \mathcal{Y}} r_{\theta^*}(x, y) \leq \tilde{Z}_{\theta^*}(x)$ .*
- *Under Assumption 4.1, we have  $\sup_{x \in \mathcal{X}} \tilde{Z}_{\theta^*}(x) \leq R_{\max} + \frac{1}{\gamma}$ .*

*Proof.* Using the following representation,

$$\tilde{\pi}_{\theta^*}^\gamma(y|x) = \frac{\bar{\pi}_{\boldsymbol{\beta}, \text{ref}}(y|x)}{\gamma(\tilde{Z}_{\theta^*}(x) - r_{\theta^*}(x, y))},$$

we can conclude that for a given  $x \in \mathcal{X}$ ,  $\sup_{y \in \mathcal{Y}} r_{\theta^*}(x, y) \leq \tilde{Z}_{\theta^*}(x)$ . Otherwise,  $\tilde{\pi}_{\theta^*}^\gamma(y|x)$  will be negative.

For the second part, let's proceed by contradiction. Suppose there exists some  $x \in \mathcal{X}$  such that:

Under this assumption, we can show that:

$$\int_{\mathcal{Y}} \tilde{\pi}_{\theta^*}^\gamma(y|x) (dy) < 1.$$

This contradicts the fundamental requirement that

$$\tilde{\pi}_{\theta^*}^\gamma(y|x),$$

must be a probability distribution. Therefore, our initial assumption must be false. Consequently, for all  $x \in \mathcal{X}$ , we must have:

$$\tilde{Z}_{\theta^*}(x) \leq \sup_{y \in \mathcal{Y}} r_{\theta^*}(x, y) + \frac{1}{\gamma}.$$

Taking the supremum of both sides with respect to  $x$  completes the proof.  $\square$

**Proposition E.4.** For a given response,  $x \in \mathcal{X}$ , the following upper bound holds,

$$\begin{aligned} \tilde{\mathcal{J}}^\gamma(\tilde{\pi}_{\theta^*}^\gamma(\cdot|x), \tilde{\pi}_\theta^\gamma(\cdot|x)) &\leq \\ \int_{\mathcal{Y}} (r_{\theta^*}(x, y) - r_{\hat{\theta}}(x, y))(\tilde{\pi}_{\theta^*}^\gamma(y|x) - \tilde{\pi}_\theta^\gamma(y|x))(\mathrm{d}y). \end{aligned}$$

555

556 *Proof.* The proof is similar to Proposition D.5. Note that  $\text{KL}(\tilde{\pi}_{\beta, \text{ref}}(\cdot|x) \parallel \pi(\cdot|x))$  is a convex function  
557 with respect to  $\pi(\cdot|x)$ . Therefore,  $\tilde{\mathcal{J}}_\gamma(\tilde{\pi}_{\beta, \text{ref}}(\cdot|x), \pi(\cdot|x))$  is a concave function with respect to  $\pi(\cdot|x)$ .  
558 First, we compute the functional derivative of  $\tilde{\mathcal{J}}_\gamma(\tilde{\pi}_{\beta, \text{ref}}(\cdot|x), \pi(\cdot|x))$  with respect to  $\pi(\cdot|x)$ ,

$$\frac{\delta \tilde{\mathcal{J}}_\gamma(\tilde{\pi}_{\beta, \text{ref}}(\cdot|x), \pi(\cdot|x))}{\delta \pi} = r_{\theta^*}(x, y) + \frac{1}{\gamma} \frac{\tilde{\pi}_{\beta, \text{ref}}(\cdot|x)}{\pi(\cdot|x)}. \quad (54)$$

559 Therefore, we have,

$$\tilde{\mathcal{J}}^\gamma(\tilde{\pi}_{\theta^*}^\gamma(\cdot|x), \tilde{\pi}_\theta^\gamma(\cdot|x)) \leq \int_{\mathcal{Y}} \left( r_{\theta^*}(x, y) + \frac{1}{\gamma} \frac{\tilde{\pi}_{\beta, \text{ref}}(y|x)}{\tilde{\pi}_\theta^\gamma(y|x)} \right) (\tilde{\pi}_{\theta^*}^\gamma(y|x) - \tilde{\pi}_\theta^\gamma(y|x))(\mathrm{d}y), \quad (55)$$

560 Using the fact that  $\tilde{\pi}_\theta^\gamma(y|x) = \frac{\tilde{\pi}_{\beta, \text{ref}}(y|x)}{\gamma(Z(x) - r_{\hat{\theta}}(x, y))}$ ,

$$\begin{aligned} \tilde{\mathcal{J}}^\gamma(\tilde{\pi}_{\theta^*}^\gamma(\cdot|x), \tilde{\pi}_\theta^\gamma(\cdot|x)) &\leq \int_{\mathcal{Y}} \left( r_{\theta^*}(x, y) - r_{\hat{\theta}}(x, y) + \tilde{Z}(x) \right) (\tilde{\pi}_{\theta^*}^\gamma(y|x) - \tilde{\pi}_\theta^\gamma(y|x))(\mathrm{d}y) \\ &= \int_{\mathcal{Y}} \left( r_{\theta^*}(x, y) - r_{\hat{\theta}}(x, y) \right) (\tilde{\pi}_{\theta^*}^\gamma(y|x) - \tilde{\pi}_\theta^\gamma(y|x))(\mathrm{d}y), \end{aligned} \quad (56)$$

561 where the last equality follows from the fact that  $\tilde{Z}(x)$  is just dependent on  $x$ .  $\square$

**Theorem 6.2.** Under Assumption 4.1, 4.2 and 4.4, the following upper bound holds on the sub-optimality gap with probability at least  $(1 - \delta)$  for  $\delta \in (0, 1)$ ,

$$\tilde{\mathcal{J}}^\gamma(\tilde{\pi}_{\theta^*}^\gamma(\cdot|x), \tilde{\pi}_\theta^\gamma(\cdot|x)) \leq 16C_{\beta, \varepsilon_{\text{fkl}}} e^{2R_{\max}} R_{\max} \sqrt{\frac{\log(|\mathcal{R}|/\delta)}{n}}.$$

562

563 *Proof.* From Proposition E.4, we have,

$$\begin{aligned} \tilde{\mathcal{J}}^\gamma(\tilde{\pi}_{\theta^*}^\gamma(\cdot|x), \tilde{\pi}_\theta^\gamma(\cdot|x)) &\leq \int_{\mathcal{Y}} \left( r_{\theta^*}(x, y) - r_{\hat{\theta}}(x, y) \right) (\tilde{\pi}_{\theta^*}^\gamma(y|x) - \tilde{\pi}_\theta^\gamma(y|x))(\mathrm{d}y) \\ &= \int_{\mathcal{Y}} \left( r_{\theta^*}(x, y) - r_{\hat{\theta}}(x, y) - h(x) \right) (\tilde{\pi}_{\theta^*}^\gamma(y|x) - \tilde{\pi}_\theta^\gamma(y|x))(\mathrm{d}y) \\ &= \int_{\mathcal{Y}} \left( r_{\theta^*}(x, y) - r_{\hat{\theta}}(x, y) - h(x) \right) \tilde{\pi}_{\beta, \text{ref}}(y|x) \frac{(\tilde{\pi}_{\theta^*}^\gamma(y|x) - \tilde{\pi}_\theta^\gamma(y|x))}{\tilde{\pi}_{\beta, \text{ref}}(y|x)}(\mathrm{d}y) \\ &\leq \sqrt{\int_{\mathcal{Y}} \left( r_{\theta^*}(x, y) - r_{\hat{\theta}}(x, y) - h(x) \right)^2 (\tilde{\pi}_{\beta, \text{ref}}(y|x))^2(\mathrm{d}y)} \sqrt{\int_{\mathcal{Y}} \frac{(\tilde{\pi}_{\theta^*}^\gamma(y|x) - \tilde{\pi}_\theta^\gamma(y|x))^2}{(\tilde{\pi}_{\beta, \text{ref}}(y|x))^2}(\mathrm{d}y)} \\ &\leq \sqrt{\int_{\mathcal{Y}} \left( r_{\theta^*}(x, y) - r_{\hat{\theta}}(x, y) - h(x) \right)^2 \tilde{\pi}_{\beta, \text{ref}}(y|x)(\mathrm{d}y)} \sqrt{\int_{\mathcal{Y}} \frac{(\tilde{\pi}_{\theta^*}^\gamma(y|x) - \tilde{\pi}_\theta^\gamma(y|x))^2}{(\tilde{\pi}_{\beta, \text{ref}}(y|x))^2}(\mathrm{d}y)} \\ &\leq 16C_{\beta, \varepsilon_{\text{fkl}}} e^{2R_{\max}} R_{\max} \sqrt{\frac{\log(|\mathcal{R}|/\delta)}{n}}, \end{aligned} \quad (57)$$

564 where the first, second, and last inequalities follow from the Cauchy–Schwarz inequality,  
565  $(\tilde{\pi}_{\beta, \text{ref}}(y|x))^2 \leq \tilde{\pi}_{\beta, \text{ref}}(y|x)$  and using Assumption 4.5 and Lemma B.1, respectively.  $\square$

**Theorem 6.3.** Under Assumption 4.1, 4.2 and 4.4, there exists constant  $D > 0$  such that the following upper bound holds on optimality gap of the multiple reference forward KL-regularized RLHF algorithm with probability at least  $(1 - \delta)$  for  $\delta \in (0, 1)$ ,

$$\begin{aligned} & \tilde{\mathcal{J}}(\tilde{\pi}_{\theta^*}^\gamma(\cdot|x), \tilde{\pi}_{\hat{\theta}}^\gamma(\cdot|x)) \\ & \leq 16C_{\boldsymbol{\beta}, \varepsilon_{\text{fkl}}} e^{2R_{\max}} R_{\max} \sqrt{\frac{\log(|\mathcal{R}|/\delta)}{n}} + \frac{\max(|\log(C_{\boldsymbol{\beta}, \varepsilon_{\text{fkl}})|), \log(\gamma R_{\max} + 1))}{\gamma} \end{aligned}$$

566

567 *Proof.* We have the following decomposition of the optimality gap,

$$\begin{aligned} \tilde{\mathcal{J}}(\tilde{\pi}_{\theta^*}^\gamma(\cdot|x), \tilde{\pi}_{\hat{\theta}}^\gamma(\cdot|x)) &= \tilde{\mathcal{J}}^\gamma(\tilde{\pi}_{\theta^*}^\gamma(\cdot|x), \tilde{\pi}_{\hat{\theta}}^\gamma(\cdot|x)) \\ &+ \frac{\text{KL}(\tilde{\pi}_{\boldsymbol{\beta}, \text{ref}}(\cdot|x) \parallel \tilde{\pi}_{\hat{\theta}}^\gamma(\cdot|x)) - \text{KL}(\tilde{\pi}_{\boldsymbol{\beta}, \text{ref}}(\cdot|x) \parallel \tilde{\pi}_{\theta^*}^\gamma(\cdot|x))}{\gamma}. \end{aligned} \quad (58)$$

568 For second term, using the fact that,  $\tilde{\pi}_{\hat{\theta}}^\gamma(y|x) = \frac{\tilde{\pi}_{\boldsymbol{\beta}, \text{ref}}(y|x)}{\gamma(\tilde{Z}_{\hat{\theta}}(x) - r_{\hat{\theta}}(x, y))}$  and  $\tilde{\pi}_{\theta^*}^\gamma(y|x) = \frac{\tilde{\pi}_{\boldsymbol{\beta}, \text{ref}}(y|x)}{\gamma(\tilde{Z}_{\theta^*}(x) - r_{\theta^*}(x, y))}$ ,  
569 we have,

$$\begin{aligned} & \frac{\text{KL}(\tilde{\pi}_{\boldsymbol{\beta}, \text{ref}}(\cdot|x) \parallel \tilde{\pi}_{\hat{\theta}}^\gamma(\cdot|x)) - \text{KL}(\tilde{\pi}_{\boldsymbol{\beta}, \text{ref}}(\cdot|x) \parallel \tilde{\pi}_{\theta^*}^\gamma(\cdot|x))}{\gamma} \\ &= \frac{\mathbb{E}_{Y \sim \tilde{\pi}_{\boldsymbol{\beta}, \text{ref}}(\cdot|x)}[\log(\gamma(\tilde{Z}_{\hat{\theta}}(x) - r_{\hat{\theta}}(x, y)))] - \mathbb{E}_{Y \sim \tilde{\pi}_{\boldsymbol{\beta}, \text{ref}}(\cdot|x)}[\log(\gamma(\tilde{Z}_{\theta^*}(x) - r_{\theta^*}(x, y)))]}{\gamma} \\ &\leq \frac{|\mathbb{E}_{Y \sim \tilde{\pi}_{\boldsymbol{\beta}, \text{ref}}(\cdot|x)}[\log(\gamma(\tilde{Z}_{\hat{\theta}}(x) - r_{\hat{\theta}}(x, y)))]| + |\mathbb{E}_{Y \sim \tilde{\pi}_{\boldsymbol{\beta}, \text{ref}}(\cdot|x)}[\log(\gamma(\tilde{Z}_{\theta^*}(x) - r_{\theta^*}(x, y)))]|}{\gamma} \\ &\leq \frac{\max(|\log(C_{\varepsilon, \text{fkl}})|, \log(\gamma R_{\max} + 1))}{\gamma}, \end{aligned} \quad (59)$$

570 where the last inequality follows from Lemma E.3. The final result holds by combining Theorem 6.2  
571 with (59).  $\square$

## F Extension to DPO

Our current results for reverse KL-regularized RLHF and forward KL-regularized RLHF can be extended to the DPO framework [Rafailov et al., 2023]. In particular, we can derive the following DPO function for reverse KL-regularized under multiple reference models scenario using Theorem 5.1,

$$\pi_{\text{DPO}, \hat{\theta}}^{\text{RKL}} = \arg \max_{\pi_{\theta} \in \Pi} \sum_{i=1}^n \log \left[ \sigma \left( \frac{1}{\gamma} \log \left( \frac{\pi_{\theta}(y_i^w | x_i)}{\pi_{\alpha, \text{ref}}(y_i^w | x_i)} \right) - \frac{1}{\gamma} \log \left( \frac{\pi_{\theta}(y_i^l | x_i)}{\pi_{\alpha, \text{ref}}(y_i^l | x_i)} \right) \right) \right]. \quad (60)$$

For forward KL-regularized DPO, we can combine Theorem 6.1 with the approach outlined in [Wang et al., 2024a], to derive the DPO function,

$$\pi_{\text{DPO}, \hat{\theta}}^{\text{FKL}} = \arg \max_{\pi_{\theta} \in \Pi} \sum_{i=1}^n \log \left[ \sigma \left( \frac{1}{\gamma} \frac{\pi_{\beta, \text{ref}}(y_i^l | x_i)}{\pi_{\theta}(y_i^l | x_i)} - \frac{1}{\gamma} \frac{\pi_{\beta, \text{ref}}(y_i^w | x_i)}{\pi_{\theta}(y_i^w | x_i)} \right) \right]. \quad (61)$$

However, as discussed in [Song et al., 2024], DPO can not guarantee any performance under some conditions. In particular, The reverse KL-regularized case can fail under partial coverage conditions, necessitating the Global Coverage Assumption (Assumption 4.3). The forward KL-regularized case requires an even stronger condition: the ratio of reference to policy must be bounded from below away from zero. Specifically, we should have  $0 < \inf_{(x, y), \rho(x) > 0} \frac{\pi_{\beta, \text{ref}}(y | x)}{\pi_{\theta}(y | x)}$  which is a stronger assumption. For this purpose, we consider the implicit bounded reward assumptions.

Our theoretical results for reverse KL-regularized RLHF and forward KL-regularized RLHF can be applied DPO problems (60) and (61) under the following assumptions.

**Assumption F.1** ((Bounded implicit RKL reward). *For all  $y^w, y^l \in \mathcal{Y}$  and  $x \in \mathcal{X}$ , there exists a constant  $B_{\max}$  such that,*

$$\left| \frac{1}{\gamma} \log \left( \frac{\pi_{\theta}(y^w | x)}{\pi_{\alpha, \text{ref}}(y^w | x)} \right) - \frac{1}{\gamma} \log \left( \frac{\pi_{\theta}(y^l | x)}{\pi_{\alpha, \text{ref}}(y^l | x)} \right) \right| \leq B_{\max}. \quad (62)$$

**Assumption F.2** ((Bounded implicit FKL reward). *For all  $y^w, y^l \in \mathcal{Y}$  and  $x \in \mathcal{X}$ , there exists a constant  $D_{\max}$  such that,*

$$\left| \frac{1}{\gamma} \frac{\pi_{\beta, \text{ref}}(y_i^l | x_i)}{\pi_{\theta}(y_i^l | x_i)} - \frac{1}{\gamma} \frac{\pi_{\beta, \text{ref}}(y_i^w | x_i)}{\pi_{\theta}(y_i^w | x_i)} \right| \leq D_{\max}. \quad (63)$$

**Lemma F.3** (Lemma E.5 from [Huang et al., 2024]). *Under Assumptions 4.1, F.1 and 4.2, we have with probability at least  $1 - \delta$  that*

$$\begin{aligned} & \mathbb{E}_{Y^l, Y^w \sim \pi_{\text{ref}}, \pi_{\text{ref}}} \left[ \left( r_{\theta^*}(x, Y^l) - r_{\theta^*}(x, Y^w) - r_{\hat{\theta}}(x, Y^l) + r_{\hat{\theta}}(x, Y^w) \right)^2 \right] \\ & \leq \frac{128 B_{\max}^2 \exp(4 R_{\max}) \log(|\mathcal{R}|/\delta)}{n}. \end{aligned} \quad (64)$$

The same results also holds under Assumption F.2.

**Theorem F.4.** *Under Assumptions F.1, 4.1, 4.2 and 4.4, there exists constant  $C > 0$  such that the following upper bound holds on the optimality gap of DPO based on reverse KL-regularization with probability at least  $(1 - \delta)$  for  $\delta \in (0, 1/2)$ ,*

$$\begin{aligned} \mathcal{J}(\pi_{\theta^*}^{\gamma}(\cdot | x), \pi_{\hat{\theta}}^{\gamma}(\cdot | x)) & \leq \gamma C_{\alpha, \varepsilon_{\text{rkl}}} 128 e^{4 R_{\max}} B_{\max}^2 \frac{\log(|\mathcal{R}|/\delta)}{n} \\ & \quad + C 8 B_{\max} e^{2 R_{\max}} \sqrt{\frac{2 C_{\alpha, \varepsilon_{\text{rkl}}} \log(|\mathcal{R}|/\delta)}{n}}. \end{aligned}$$

*Proof.* The proof is similar to Theorem 5.3 using Lemma F.3. □

**Theorem F.5.** Under Assumptions F.2, 4.1, 4.2 and 4.4, the following upper bound holds on optimality gap of DPO based on forward KL-regularization with probability at least  $(1 - \delta)$  for  $\delta \in (0, 1)$ ,

$$\begin{aligned} \tilde{\mathcal{J}}(\tilde{\pi}_{\theta^*}^\gamma(\cdot|x), \tilde{\pi}_{\theta}^\gamma(\cdot|x)) &\leq 16C_{\beta, \varepsilon_{\text{fkl}}} e^{2R_{\max}} D_{\max} \sqrt{\frac{\log(|\mathcal{R}|/\delta)}{n}} \\ &\quad + \frac{\max(|\log(C_{\varepsilon, \text{fkl}})|, \log(\gamma R_{\max} + 1))}{\gamma} \end{aligned}$$

595

596 *Proof.* The proof is similar to Theorem 6.3 by using Lemma F.3.  $\square$

## 597 G Further Discussion

598 **Coverage Assumption Discussion:** The coverage assumptions for multiple references can differ from  
599 the single reference scenario. For the reverse KL-regularized case with reference policy  $\hat{\pi}_{\alpha, \text{ref}}(\cdot|x)$ ,  
600 we have:

$$\frac{\pi(y|x)}{\hat{\pi}_{\alpha, \text{ref}}(\cdot|x)} = F_{\alpha}(x) \prod_{i=1}^K \left( \frac{\pi(y|x)}{\pi_{\text{ref}, i}(y|x)} \right)^{\alpha_i}, \quad (65)$$

601 where  $F_{\alpha}(x)$  is defined in (15). Therefore, we have  $\prod_{i=1}^K C_{\text{ref}, i}^{\alpha_i}$  as the global coverage assumption,  
602 where  $C_{\text{ref}, i} < \infty$  is the global coverage with respect to the  $i$ -th reference. Note that, using  
603 Hölder’s inequality, we can show that  $F_{\alpha}(x) \leq 1$ . A similar discussion applies to the forward  
604 KL-regularization scenario with reference policy  $\tilde{\pi}_{\beta, \text{ref}}(y|x)$ . Regarding the local reverse KL-ball  
605 coverage assumptions (Assumption 4.4), as  $\hat{\pi}_{\alpha, \text{ref}}(\cdot|x)$  is defined on common support among all  
606 reference models, then the set of policies with bounded

$$\mathbb{E}_{x \sim \rho} [\text{KL}(\pi(\cdot|x) \parallel \hat{\pi}_{\alpha, \text{ref}}(\cdot|x))] \leq \varepsilon_{\alpha, \text{rkl}}, \quad (66)$$

607 is smaller than each reference model separately. Similarly to global coverage, we can assume that  
608  $C_{\alpha, \varepsilon_{\text{rkl}}} = \prod_{i=1}^K C_{\text{ref}, i, \varepsilon_{\text{rkl}}}^{\alpha_i}$ .

609 **Comparison of RKL with FKL:** The RKL and FKL exhibit fundamentally different characteristics  
610 in their optimization behavior. RKL between the reference model and target policy, defined as  
611  $\mathbb{E}_{\pi_{\theta^*}} [\log(\pi_{\theta^*}/\pi_{\text{ref}})]$ , demonstrates mode-seeking behavior during optimization. When  $\pi_{\theta^*}$  represents  
612 the output policy of RLHF for language model alignment, it may assign zero probability to regions  
613 where  $\pi_{\text{ref}}$  is positive. Conversely, FKL, expressed as  $\mathbb{E}_{\pi_{\text{ref}}} [\log(\pi_{\text{ref}}/\pi_{\theta^*})]$ , exhibits mass-covering  
614 properties. Its mathematical formulation requires  $\pi_{\theta^*}$  to maintain non-zero probability wherever  $\pi_{\text{ref}}$   
615 is positive. This constraint naturally leads FKL to produce distributions that cover the full support of  
616 the reference model, thereby promoting diverse outputs.

617 **Reference policy in multiple reference model scenario under FKL and RKL:** In the multiple  
618 reference model setting, the generalized escort distribution under reverse KL-regularization covers the  
619 intersection of the supports of all reference models. Specifically, responses receive zero probability  
620 if they lack positive probability in any single reference model. This leads the generalized escort  
621 distribution to assign non-zero probabilities only to responses supported by all reference models  
622 simultaneously. In contrast, when using the average distribution as the reference model in the forward  
623 KL scenario, the resulting distribution covers the union of supports across all reference models,  
624 encompassing a broader range of possible responses.

625 **Comparison in terms of other parameters:** In Table 1, we compared different methods in terms  
626 of their sample complexity bounds. Regarding the dependency on  $R_{\max}$ , we observe that all  
627 existing bounds for RLHF with RKL regularization scale as  $O(\exp(R_{\max}))$  [Song et al., 2024, Zhao  
628 et al., 2024, Chang et al., 2024, Xiong et al., 2024]. This exponential dependency arises directly  
629 from Lemma B.1, reflecting the inherent non-linearity introduced by the sigmoid function in the  
630 Bradley–Terry model. Additionally, concerning the coverage constant, the upper bounds under RKL  
631 regularization scale as  $O(C_{\alpha, \varepsilon_{\text{rkl}}})$ , highlighting the significant impact of coverage parameters on  
632 optimal and suboptimal regret bounds.



## 633 H Experiment Details

634 Implementation code is provided at [https://anonymous.4open.science/r/multi\\_ref-AB25/](https://anonymous.4open.science/r/multi_ref-AB25/README.md)  
635 [README.md](https://anonymous.4open.science/r/multi_ref-AB25/README.md).

636 To ensure fair comparison across algorithms, we began by conducting an independent hyperparameter  
637 search for each method. For the GRPO experiment, we explored learning rates of  $\{1e-3, 1e-4, 1e-5\}$   
638 and KL coefficients of  $\{0.05, 0.1, 0.2\}$ . For the DPO experiments, we explored learning rates of  
639  $\{1e-6, 1e-7, 1e-8\}$ . We also tried different  $\gamma$  values but found that the default one works the best in  
640 all cases. After selecting the best configuration for each algorithm, we trained each setup three times  
641 with different random seeds to estimate variability and compute confidence intervals.

642 In the case of GRPO, using the full FKL objective would require sampling from the reference model,  
643 which roughly doubles training time. To reduce this cost, we instead approximated the FKL term by  
644 sampling from the trained model and computing a per-token objective—striking a balance between  
645 efficiency and fidelity to the theoretical objective.

646 Our data splits were chosen to reflect standard practice where possible. For GSM8K, we used the  
647 official train-test split. Since UltraFeedback does not provide an official split, we randomly withheld  
648 10% of the dataset and used the corresponding prompts for evaluation.

649 All experiments were conducted on A100 GPUs. Offline RLHF training used a single GPU, while  
650 online training required two. Although multi-reference RL introduces some additional computational  
651 requirements—specifically, evaluating logits from another policy—the cost is modest. In offline  
652 settings such as DPO, reference model logits can be precomputed and stored, avoiding memory  
653 overhead during training. In online settings like GRPO, the reference policy must reside in memory,  
654 but placing it on a separate GPU resulted in only a 10% slowdown.

## NeurIPS Paper Checklist

### 1. Claims

Question: Do the main claims made in the abstract and introduction accurately reflect the paper's contributions and scope?

Answer: [\[Yes\]](#)

Justification: See Section 1 and Abstract.

Guidelines:

- The answer NA means that the abstract and introduction do not include the claims made in the paper.
- The abstract and/or introduction should clearly state the claims made, including the contributions made in the paper and important assumptions and limitations. A No or NA answer to this question will not be perceived well by the reviewers.
- The claims made should match theoretical and experimental results, and reflect how much the results can be expected to generalize to other settings.
- It is fine to include aspirational goals as motivation as long as it is clear that these goals are not attained by the paper.

### 2. Limitations

Question: Does the paper discuss the limitations of the work performed by the authors?

Answer: [\[Yes\]](#)

Justification: See Conclusion and future works section (Section 9).

Guidelines:

- The answer NA means that the paper has no limitation while the answer No means that the paper has limitations, but those are not discussed in the paper.
- The authors are encouraged to create a separate "Limitations" section in their paper.
- The paper should point out any strong assumptions and how robust the results are to violations of these assumptions (e.g., independence assumptions, noiseless settings, model well-specification, asymptotic approximations only holding locally). The authors should reflect on how these assumptions might be violated in practice and what the implications would be.
- The authors should reflect on the scope of the claims made, e.g., if the approach was only tested on a few datasets or with a few runs. In general, empirical results often depend on implicit assumptions, which should be articulated.
- The authors should reflect on the factors that influence the performance of the approach. For example, a facial recognition algorithm may perform poorly when image resolution is low or images are taken in low lighting. Or a speech-to-text system might not be used reliably to provide closed captions for online lectures because it fails to handle technical jargon.
- The authors should discuss the computational efficiency of the proposed algorithms and how they scale with dataset size.
- If applicable, the authors should discuss possible limitations of their approach to address problems of privacy and fairness.
- While the authors might fear that complete honesty about limitations might be used by reviewers as grounds for rejection, a worse outcome might be that reviewers discover limitations that aren't acknowledged in the paper. The authors should use their best judgment and recognize that individual actions in favor of transparency play an important role in developing norms that preserve the integrity of the community. Reviewers will be specifically instructed to not penalize honesty concerning limitations.

### 3. Theory assumptions and proofs

Question: For each theoretical result, does the paper provide the full set of assumptions and a complete (and correct) proof?

Answer: [\[Yes\]](#)

Justification: See Section 4.2

Guidelines:

- The answer NA means that the paper does not include theoretical results.
- All the theorems, formulas, and proofs in the paper should be numbered and cross-referenced.
- All assumptions should be clearly stated or referenced in the statement of any theorems.
- The proofs can either appear in the main paper or the supplemental material, but if they appear in the supplemental material, the authors are encouraged to provide a short proof sketch to provide intuition.
- Inversely, any informal proof provided in the core of the paper should be complemented by formal proofs provided in appendix or supplemental material.
- Theorems and Lemmas that the proof relies upon should be properly referenced.

#### 4. Experimental result reproducibility

Question: Does the paper fully disclose all the information needed to reproduce the main experimental results of the paper to the extent that it affects the main claims and/or conclusions of the paper (regardless of whether the code and data are provided or not)?

Answer: [Yes]

Justification: All necessary details are listed in Appendix H.

Guidelines:

- The answer NA means that the paper does not include experiments.
- If the paper includes experiments, a No answer to this question will not be perceived well by the reviewers: Making the paper reproducible is important, regardless of whether the code and data are provided or not.
- If the contribution is a dataset and/or model, the authors should describe the steps taken to make their results reproducible or verifiable.
- Depending on the contribution, reproducibility can be accomplished in various ways. For example, if the contribution is a novel architecture, describing the architecture fully might suffice, or if the contribution is a specific model and empirical evaluation, it may be necessary to either make it possible for others to replicate the model with the same dataset, or provide access to the model. In general, releasing code and data is often one good way to accomplish this, but reproducibility can also be provided via detailed instructions for how to replicate the results, access to a hosted model (e.g., in the case of a large language model), releasing of a model checkpoint, or other means that are appropriate to the research performed.
- While NeurIPS does not require releasing code, the conference does require all submissions to provide some reasonable avenue for reproducibility, which may depend on the nature of the contribution. For example
  - (a) If the contribution is primarily a new algorithm, the paper should make it clear how to reproduce that algorithm.
  - (b) If the contribution is primarily a new model architecture, the paper should describe the architecture clearly and fully.
  - (c) If the contribution is a new model (e.g., a large language model), then there should either be a way to access this model for reproducing the results or a way to reproduce the model (e.g., with an open-source dataset or instructions for how to construct the dataset).
  - (d) We recognize that reproducibility may be tricky in some cases, in which case authors are welcome to describe the particular way they provide for reproducibility. In the case of closed-source models, it may be that access to the model is limited in some way (e.g., to registered users), but it should be possible for other researchers to have some path to reproducing or verifying the results.

#### 5. Open access to data and code

Question: Does the paper provide open access to the data and code, with sufficient instructions to faithfully reproduce the main experimental results, as described in supplemental material?

Answer: [Yes]

Justification: All code needed to reproduce the experiments will be released.

Guidelines:

- The answer NA means that paper does not include experiments requiring code.
- Please see the NeurIPS code and data submission guidelines (<https://nips.cc/public/guides/CodeSubmissionPolicy>) for more details.
- While we encourage the release of code and data, we understand that this might not be possible, so “No” is an acceptable answer. Papers cannot be rejected simply for not including code, unless this is central to the contribution (e.g., for a new open-source benchmark).
- The instructions should contain the exact command and environment needed to run to reproduce the results. See the NeurIPS code and data submission guidelines (<https://nips.cc/public/guides/CodeSubmissionPolicy>) for more details.
- The authors should provide instructions on data access and preparation, including how to access the raw data, preprocessed data, intermediate data, and generated data, etc.
- The authors should provide scripts to reproduce all experimental results for the new proposed method and baselines. If only a subset of experiments are reproducible, they should state which ones are omitted from the script and why.
- At submission time, to preserve anonymity, the authors should release anonymized versions (if applicable).
- Providing as much information as possible in supplemental material (appended to the paper) is recommended, but including URLs to data and code is permitted.

## 6. Experimental setting/details

Question: Does the paper specify all the training and test details (e.g., data splits, hyper-parameters, how they were chosen, type of optimizer, etc.) necessary to understand the results?

Answer: [Yes]

Justification: Yes, the training algorithms are detailed in the paper and all the necessary information is disclosed.

Guidelines:

- The answer NA means that the paper does not include experiments.
- The experimental setting should be presented in the core of the paper to a level of detail that is necessary to appreciate the results and make sense of them.
- The full details can be provided either with the code, in appendix, or as supplemental material.

## 7. Experiment statistical significance

Question: Does the paper report error bars suitably and correctly defined or other appropriate information about the statistical significance of the experiments?

Answer: [Yes]

Justification: All experiments include 95% CI,

Guidelines:

- The answer NA means that the paper does not include experiments.
- The authors should answer "Yes" if the results are accompanied by error bars, confidence intervals, or statistical significance tests, at least for the experiments that support the main claims of the paper.
- The factors of variability that the error bars are capturing should be clearly stated (for example, train/test split, initialization, random drawing of some parameter, or overall run with given experimental conditions).
- The method for calculating the error bars should be explained (closed form formula, call to a library function, bootstrap, etc.)
- The assumptions made should be given (e.g., Normally distributed errors).

- It should be clear whether the error bar is the standard deviation or the standard error of the mean.
- It is OK to report 1-sigma error bars, but one should state it. The authors should preferably report a 2-sigma error bar than state that they have a 96% CI, if the hypothesis of Normality of errors is not verified.
- For asymmetric distributions, the authors should be careful not to show in tables or figures symmetric error bars that would yield results that are out of range (e.g. negative error rates).
- If error bars are reported in tables or plots, The authors should explain in the text how they were calculated and reference the corresponding figures or tables in the text.

## 8. Experiments compute resources

Question: For each experiment, does the paper provide sufficient information on the computer resources (type of compute workers, memory, time of execution) needed to reproduce the experiments?

Answer: [Yes]

Justification: We explicitly mentioned the type and amount of compute that was required for our experiments.

Guidelines:

- The answer NA means that the paper does not include experiments.
- The paper should indicate the type of compute workers CPU or GPU, internal cluster, or cloud provider, including relevant memory and storage.
- The paper should provide the amount of compute required for each of the individual experimental runs as well as estimate the total compute.
- The paper should disclose whether the full research project required more compute than the experiments reported in the paper (e.g., preliminary or failed experiments that didn't make it into the paper).

## 9. Code of ethics

Question: Does the research conducted in the paper conform, in every respect, with the NeurIPS Code of Ethics <https://neurips.cc/public/EthicsGuidelines>?

Answer: [Yes]

Justification: We reviewed the Code of Ethics and made sure we conform to it.

Guidelines:

- The answer NA means that the authors have not reviewed the NeurIPS Code of Ethics.
- If the authors answer No, they should explain the special circumstances that require a deviation from the Code of Ethics.
- The authors should make sure to preserve anonymity (e.g., if there is a special consideration due to laws or regulations in their jurisdiction).

## 10. Broader impacts

Question: Does the paper discuss both potential positive societal impacts and negative societal impacts of the work performed?

Answer: [NA]

Justification: Our main contribution is theoretical.

Guidelines:

- The answer NA means that there is no societal impact of the work performed.
- If the authors answer NA or No, they should explain why their work has no societal impact or why the paper does not address societal impact.
- Examples of negative societal impacts include potential malicious or unintended uses (e.g., disinformation, generating fake profiles, surveillance), fairness considerations (e.g., deployment of technologies that could make decisions that unfairly impact specific groups), privacy considerations, and security considerations.

- The conference expects that many papers will be foundational research and not tied to particular applications, let alone deployments. However, if there is a direct path to any negative applications, the authors should point it out. For example, it is legitimate to point out that an improvement in the quality of generative models could be used to generate deepfakes for disinformation. On the other hand, it is not needed to point out that a generic algorithm for optimizing neural networks could enable people to train models that generate Deepfakes faster.
- The authors should consider possible harms that could arise when the technology is being used as intended and functioning correctly, harms that could arise when the technology is being used as intended but gives incorrect results, and harms following from (intentional or unintentional) misuse of the technology.
- If there are negative societal impacts, the authors could also discuss possible mitigation strategies (e.g., gated release of models, providing defenses in addition to attacks, mechanisms for monitoring misuse, mechanisms to monitor how a system learns from feedback over time, improving the efficiency and accessibility of ML).

## 11. Safeguards

Question: Does the paper describe safeguards that have been put in place for responsible release of data or models that have a high risk for misuse (e.g., pretrained language models, image generators, or scraped datasets)?

Answer: [NA]

Justification: Our main contribution is theoretical.

Guidelines:

- The answer NA means that the paper poses no such risks.
- Released models that have a high risk for misuse or dual-use should be released with necessary safeguards to allow for controlled use of the model, for example by requiring that users adhere to usage guidelines or restrictions to access the model or implementing safety filters.
- Datasets that have been scraped from the Internet could pose safety risks. The authors should describe how they avoided releasing unsafe images.
- We recognize that providing effective safeguards is challenging, and many papers do not require this, but we encourage authors to take this into account and make a best faith effort.

## 12. Licenses for existing assets

Question: Are the creators or original owners of assets (e.g., code, data, models), used in the paper, properly credited and are the license and terms of use explicitly mentioned and properly respected?

Answer: [Yes]

Justification: Yes, all code that was used in this work was mentioned and cited appropriately.

Guidelines:

- The answer NA means that the paper does not use existing assets.
- The authors should cite the original paper that produced the code package or dataset.
- The authors should state which version of the asset is used and, if possible, include a URL.
- The name of the license (e.g., CC-BY 4.0) should be included for each asset.
- For scraped data from a particular source (e.g., website), the copyright and terms of service of that source should be provided.
- If assets are released, the license, copyright information, and terms of use in the package should be provided. For popular datasets, [paperswithcode.com/datasets](https://paperswithcode.com/datasets) has curated licenses for some datasets. Their licensing guide can help determine the license of a dataset.
- For existing datasets that are re-packaged, both the original license and the license of the derived asset (if it has changed) should be provided.



- If this information is not available online, the authors are encouraged to reach out to the asset’s creators.

### 13. New assets

Question: Are new assets introduced in the paper well documented and is the documentation provided alongside the assets?

Answer: [NA]

Justification: We did not introduce any new assets.

Guidelines:

- The answer NA means that the paper does not release new assets.
- Researchers should communicate the details of the dataset/code/model as part of their submissions via structured templates. This includes details about training, license, limitations, etc.
- The paper should discuss whether and how consent was obtained from people whose asset is used.
- At submission time, remember to anonymize your assets (if applicable). You can either create an anonymized URL or include an anonymized zip file.

### 14. Crowdsourcing and research with human subjects

Question: For crowdsourcing experiments and research with human subjects, does the paper include the full text of instructions given to participants and screenshots, if applicable, as well as details about compensation (if any)?

Answer: [NA]

Justification: Paper does not involve crowdsourcing nor research with human subjects.

Guidelines:

- The answer NA means that the paper does not involve crowdsourcing nor research with human subjects.
- Including this information in the supplemental material is fine, but if the main contribution of the paper involves human subjects, then as much detail as possible should be included in the main paper.
- According to the NeurIPS Code of Ethics, workers involved in data collection, curation, or other labor should be paid at least the minimum wage in the country of the data collector.

### 15. Institutional review board (IRB) approvals or equivalent for research with human subjects

Question: Does the paper describe potential risks incurred by study participants, whether such risks were disclosed to the subjects, and whether Institutional Review Board (IRB) approvals (or an equivalent approval/review based on the requirements of your country or institution) were obtained?

Answer: [NA]

Justification:[NA]

Guidelines:

- The answer NA means that the paper does not involve crowdsourcing nor research with human subjects.
- Depending on the country in which research is conducted, IRB approval (or equivalent) may be required for any human subjects research. If you obtained IRB approval, you should clearly state this in the paper.
- We recognize that the procedures for this may vary significantly between institutions and locations, and we expect authors to adhere to the NeurIPS Code of Ethics and the guidelines for their institution.
- For initial submissions, do not include any information that would break anonymity (if applicable), such as the institution conducting the review.

### 16. Declaration of LLM usage

964 Question: Does the paper describe the usage of LLMs if it is an important, original, or  
965 non-standard component of the core methods in this research? Note that if the LLM is used  
966 only for writing, editing, or formatting purposes and does not impact the core methodology,  
967 scientific rigorousness, or originality of the research, declaration is not required.

968 Answer: [NA]

969 Justification:[NA]

970 Guidelines:

- 971 • The answer NA means that the core method development in this research does not  
972 involve LLMs as any important, original, or non-standard components.
- 973 • Please refer to our LLM policy (<https://neurips.cc/Conferences/2025/LLM>)  
974 for what should or should not be described.

975
